# Supplementary material for: Factors associated with mental health outcomes across healthcare settings in Oman during COVID-19: frontline versus non-frontline healthcare workers
Source: PubMed Central journal article supplement — BMJ Open. 2020 Oct 10;10(10):e042030. doi: 10.1136/bmjopen-2020-042030 (PMC7549438; doi:10.1136/bmjopen-2020-042030), 2020-10-10
Supplement: bmjopen-2020-042030.draft_revisions.pdf [file bmjopen-2020-042030.draft_revisions.pdf]

# BMJ Open

BMJ Open is committed to open peer review. As part of this commitment we make the peer review history of every article we publish publicly available.

When an article is published we post the peer reviewers' comments and the authors' responses online. We also post the versions of the paper that were used during peer review. These are the versions that the peer review comments apply to.

The versions of the paper that follow are the versions that were submitted during the peer review process. They are not the versions of record or the final published versions. They should not be cited or distributed as the published version of this manuscript.

BMJ Open is an open access journal and the full, final, typeset and author-corrected version of record of the manuscript is available on our site with no access controls, subscription charges or pay-per-view fees (<http://bmjopen.bmj.com>).

If you have any questions on BMJ Open's open peer review process please email [info.bmjopen@bmj.com](mailto:info.bmjopen@bmj.com)

# BMJ Open

## Factors Associated with Mental Health Outcomes in Oman during COVID19: Frontline vs Non-frontline Healthcare Workers

|                               |                                                                                                                                                                                                                                                                                                                                                                                                                                                                                                                                                                                                                                                                |
|-------------------------------|----------------------------------------------------------------------------------------------------------------------------------------------------------------------------------------------------------------------------------------------------------------------------------------------------------------------------------------------------------------------------------------------------------------------------------------------------------------------------------------------------------------------------------------------------------------------------------------------------------------------------------------------------------------|
| Journal:                      | <i>BMJ Open</i>                                                                                                                                                                                                                                                                                                                                                                                                                                                                                                                                                                                                                                                |
| Manuscript ID                 | bmjopen-2020-042030                                                                                                                                                                                                                                                                                                                                                                                                                                                                                                                                                                                                                                            |
| Article Type:                 | Original research                                                                                                                                                                                                                                                                                                                                                                                                                                                                                                                                                                                                                                              |
| Date Submitted by the Author: | 23-Jun-2020                                                                                                                                                                                                                                                                                                                                                                                                                                                                                                                                                                                                                                                    |
| Complete List of Authors:     | Alshekaili , Muna ; Al Masarra Hospital<br>Hassan , Walid ; Al Massarah Hospital<br>Al Said , Nazik; Al Massarah Hospital<br>Alsulaimani , Fatima; Al Massarah Hospital<br>Kumar, Satish; Ministry of Health Oman, Centre of Studies & Research<br>Al-Mawali, Adhra; Ministry of Health Oman, Centre of Studies & Research; Ministry of Health<br>Chan , Moon ; Sultan Qaboos University College of Medicine and Health Science, Family Medicine & Public Health<br>Mahadevan, Sangeetha; Sultan Qaboos University College of Medicine and Health Science, Behavioral Medicine<br>Al-Adawi, Samir; Sultan Qaboos University, Department of Behavioral Medicine |
| Keywords:                     | Quality in health care < HEALTH SERVICES ADMINISTRATION & MANAGEMENT, Anxiety disorders < PSYCHIATRY, Depression & mood disorders < PSYCHIATRY, Public health < INFECTIOUS DISEASES                                                                                                                                                                                                                                                                                                                                                                                                                                                                            |
|                               |                                                                                                                                                                                                                                                                                                                                                                                                                                                                                                                                                                                                                                                                |

SCHOLARONE™  
Manuscripts

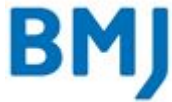

I, the Submitting Author has the right to grant and does grant on behalf of all authors of the Work (as defined in the below author licence), an exclusive licence and/or a non-exclusive licence for contributions from authors who are: i) UK Crown employees; ii) where BMJ has agreed a CC-BY licence shall apply, and/or iii) in accordance with the terms applicable for US Federal Government officers or employees acting as part of their official duties; on a worldwide, perpetual, irrevocable, royalty-free basis to BMJ Publishing Group Ltd ("BMJ") its licensees and where the relevant Journal is co-owned by BMJ to the co-owners of the Journal, to publish the Work in this journal and any other BMJ products and to exploit all rights, as set out in our [licence](#).

The Submitting Author accepts and understands that any supply made under these terms is made by BMJ to the Submitting Author unless you are acting as an employee on behalf of your employer or a postgraduate student of an affiliated institution which is paying any applicable article publishing charge ("APC") for Open Access articles. Where the Submitting Author wishes to make the Work available on an Open Access basis (and intends to pay the relevant APC), the terms of reuse of such Open Access shall be governed by a Creative Commons licence – details of these licences and which [Creative Commons](#) licence will apply to this Work are set out in our licence referred to above.

Other than as permitted in any relevant BMJ Author's Self Archiving Policies, I confirm this Work has not been accepted for publication elsewhere, is not being considered for publication elsewhere and does not duplicate material already published. I confirm all authors consent to publication of this Work and authorise the granting of this licence.

## Factors Associated with Mental Health Outcomes in Oman during COVID19: Frontline vs Non-frontline Healthcare Workers

Muna Alshekaili<sup>1</sup>, Walid Hassan<sup>1</sup>, Nazik Al-Said<sup>1</sup>, Fatima alsulimani<sup>1</sup>, Satish Kumar<sup>2</sup>, Adhra Al-Mawali<sup>2</sup>, Moon Fai Chan<sup>3</sup>, Sangeetha Mahadevan<sup>4</sup>, Samir Al-Adawi<sup>4</sup>

<sup>1</sup> Al Masarra Hospital, Ministry of Health, Wilayat Al Amerat, Muscat, Oman

<sup>2</sup> Centre of Studies & Research, Directorate General Planning, and studies, Ministry of Health, Oman

<sup>3</sup> Department of Family Medicine & Public Health, College of Medicine & Health Sciences Sultan Qaboos University, Muscat, Oman

<sup>4</sup>Department of Behavioral Medicine, College of Medicine & Health Sciences, Sultan Qaboos University, Muscat, Oman

### Corresponding author

Dr. Samir Al-Adawi

Department of Behavioral Medicine, College of Medicine & Health Sciences

Sultan Qaboos University

P.O. Box 35, P.C. 123

Al Khoudh, Muscat, Sultanate of Oman

Phone : (+968) 2414 -1139

Mobile : (+ 968) 9938 -0246

Fax : (+ 968) 2441 -3419

Email: adawi@squ.edu.om; [samir.al-adawi@fulbrightmail.org](mailto:samir.al-adawi@fulbrightmail.org)

### All Authors' emails

Muna Alshekaili [[m.alshekaili@gmail.com](mailto:m.alshekaili@gmail.com)]

Walid Hassan [[ebrahimw@mymail.vcu.edu](mailto:ebrahimw@mymail.vcu.edu)]

Nazik Al Said [[alsaidnazik@gmail.com](mailto:alsaidnazik@gmail.com)]

Fatima alsulaimani [[um-alkhalil@hotmail.com](mailto:um-alkhalil@hotmail.com)]

Sathish Kumar Jayapal [[sathish.kumar@moh.gov.om](mailto:sathish.kumar@moh.gov.om)]

Adhra Al-Mawali [[adhra.almawali@gmail.com](mailto:adhra.almawali@gmail.com)]

Moon Fai Chan [[moonf@squ.edu.om](mailto:moonf@squ.edu.om)]

Sangeetha Mahadevan [[sm5520@nyu.edu](mailto:sm5520@nyu.edu)]

Samir Al-Adawi [[samir.al-adawi@fulbrightmail.org](mailto:samir.al-adawi@fulbrightmail.org)]

**Short Title: Mental Health Outcomes of HCWs in Oman during COVID19**

**Word count: 3,361**

## Abstract

### OBJECTIVE:

This study aims to assess and compare demographic and psychological factors and sleep status of frontline HCWs in relation to non-frontline HCWs

### DESIGN, SETTINGS, AND PARTICIPANTS

This cross-sectional study was conducted using an online survey from the 8<sup>th</sup> to the 17<sup>th</sup> of April 2020 across varied health care settings in Oman accruing 1139 HCWS.

### MAIN OUTCOMES AND MEASURES

Mental health status was assessed using *Depression, Anxiety, and Stress Scales* (DASS-21), and insomnia was evaluated by the *Insomnia Severity Index* (ISI). Samples were categorized into the frontline and non-frontline groups. Chi-square, odds ratio, and independent t-tests were used to compare groups by demographic and mental health outcomes.

### Results

This study included 1139 HCWs working in Oman. There was a total of 368 (32.3%), 388 (34.1%), 271 (23.8%), and 211 (18.5%) respondents reported to have depression, anxiety, stress, and insomnia, respectively while working during the pandemic period. HCWs in the frontline group were 1.4 times more likely to have anxiety (OR=1.401,  $p=0.007$ ) and stress (OR=1.404,  $p=0.015$ ) as compared to those working in the non-frontline group. On indices of sleep-wake cycles, HCWs in the frontline group were 1.37 times more likely to report insomnia (OR=1.377,  $p=0.037$ ) when compared to those working in the non-frontline group. No significant differences in depression status between workers in the frontline and non-frontline groups were found ( $p=0.181$ ).

### CONCLUSIONS AND RELEVANCE

To our knowledge, this is the first study to explore the differential impacts of the COVID-19 pandemic on different grades of HCWs. This study suggests that frontline HCWs are disproportionately affected compared to non-frontline HCWs. The problem with managing sleep-wake cycles and anxiety symptoms were highly endorsed among frontline HCWs. As psychosocial interventions are likely to be constrained owing to the pandemic, mental health care must first be directed to frontline HCWs.

Keywords: Frontline Health Care Workers; COVID-19; Depression; Anxiety; Insomnia; The depression, Anxiety and Stress Scale; Insomnia Severity Index; Oman

## Article Summary

### Methods

- The study accrued 1139 participants of which 574 were working as frontline HCWs (565 non-frontline workers) serving patients with COVID-19 in different categories of healthcare settings in Oman.
- The following tools used were used alongside the collection of demographic information: The depression, Anxiety and Stress Scale (DASS-21) and Insomnia Severity Index.
- Strengths: This nationally representative study is the first of its kind to investigate the differences in magnitude and the covariates of stress and distress between frontline and non-frontline healthcare workers in Oman.
- Limitations: The use of an online survey and the use of symptom checklists (DASS, ISI) which are typically no match for the 'gold-standard' interviews.
- It is also not clear whether the observed mental health outcomes constitute adjustment disorders/ acute stress reaction or present a chronic-type and thus irreversible psychological distress.

**INTRODUCTION:**

COVID-19, a new strain among the class of corona-virus, has been reported to have first manifested in humans in December 2019, subsequently triggering a global pandemic [1]. Among the countries affected, specifically in the Arabian Gulf, is Oman. On February 24<sup>th</sup>, 2020, Oman reported its first two cases testing positive for COVID-19. The initial report implicated the spread of COVID-19 in Oman via citizens who had travelled abroad [2]. More recently, the Ministry of Health has reported an increasing number of people being diagnosed with COVID-19 with a few deaths and multiple recoveries [3]. With the ever-growing number of confirmed and suspected cases, the workload of healthcare workers (HCWs) has been overwhelming. The long and irregular hours of such continuous and heavy volumes of work have the potential to trigger stress and distress.

Empirical evidence suggests that stress associated with a period of tribulation tends to weaken the immune system, further increasing the risk of diseases [4]. Given this fact, in addition to having a high risk of contracting COVID-19, partly attributed to suboptimal protection [5,6], HCWs are prone to poor mental health outcomes [7,8]. Therefore, early detection among HCWs has the potential to 'pre-empt' the development of intransigent, and an advanced pathology of mental health outcomes, thereby helping to reduce the less desirable trend of having compromised HCWs during a pandemic.

The prevalence of stress and distress during times of great tribulation and seismic political, social and economic situations have been extensively investigated [9]. Studies have shown a significant peak of poor coping, maladjustment and the development of emotional disorders in the wake of such unpredictable times [10]. With the current global pandemic of COVID-19, Holmes et al. [11] have emphasized the importance of giving priority to all three tiers of social, psychological, and biological health. As stress and distress have commonly been reported among healthcare workers, often outshining the rate observed in the general population [12,13,14], the question remains whether there are differences in magnitude and the covariates of

1  
2  
3 stress and distress among those working on the frontlines and those who are not. This  
4 hypothesis has received scant attention.  
5  
6

7 While impressionistic reports on the psychosocial issues among healthcare  
8 workers have emerged in Oman [8], there is the dearth of studies that address these  
9 issues among a nationally-representative sample of healthcare workers. This study  
10 from Oman aims to fill this gap in the existing literature. Thus, this study assessed and  
11 compared the demographic and psychological factors and sleep status of frontline  
12 HCWs vs non-frontline HCWs. Understanding demographic factors that have the  
13 potential to tamper with relevant preventative measures and knowing if their  
14 magnitude is higher among frontline HCWs will help inform the urgent mechanisms  
15 that are needed to preserve the wellbeing and resilience of such subtypes of HCWs  
16 [11].  
17  
18  
19  
20  
21  
22  
23  
24  
25  
26  
27  
28

## 29 **Methods**

### 30 **SETTING AND PARTICIPANTS**

31 This cross-sectional study was conducted from 8<sup>th</sup> April to 17<sup>th</sup> April 2020 across the  
32 varied health care settings in the country. Oman has a universal free healthcare system and is  
33 divided into primary, secondary, tertiary, and polyclinics [15]. According to the Ministry of  
34 Health of Oman, the first point of contact with healthcare is the primary healthcare setting. If  
35 the service seeker should require secondary or tertiary care, then they are referred or  
36 transported to the relevant catchment areas with secondary or tertiary care services.  
37  
38  
39  
40  
41  
42  
43

44 With persisting social distancing, the study proforma was disseminated using  
45 emails of representative HCWs working in different regions of the country [16]. After  
46 initial contact, potential respondents were also asked to disseminate the information  
47 to their colleagues to increase the response rate.  
48  
49  
50

51 Oman has eleven administrative regions known as governorates or *muhafazah*  
52 [16]. Concerted efforts were made to accrue participants from all such regions in the  
53 country. One relevant clinical department was randomly sampled from each chosen  
54 healthcare setting, and all HCWs in this department were asked to participate in this  
55 study. The required sample size corresponding to an acceptable margin of error for  
56  
57  
58  
59  
60



1  
2  
3 proportion (0.1) was calculated. The proportion of HCWs with psychological  
4 comorbidity was estimated at 35%, based on an earlier SARS and COVID-19 outbreak  
5 report [7, 17]. To allow for analysis of the relevant subgroups, the investigators of this  
6 study increased the sample size by 50 percent intending to reach at least 1070  
7 participants. The study proforma was available in both Arabic and English and could  
8 be accessed via an online platform (google document) and any information about this  
9 study was in the form itself. All respondents provided informed consent. At the end of  
10 the study survey, 1160 healthcare workers returned a fully completed study proforma  
11  
12  
13  
14  
15  
16  
17  
18  
19  
20

### 21 **Outcomes and Covariates**

22  
23 **The depression, Anxiety and Stress Scale (DASS-21):** DASS-21 is a self-report  
24 screening checklist designed to measure the negative feelings that are broadly  
25 categorized as depressive symptoms, anxiety, and stress [18]. Both the English and  
26 non-English (including Arabic) versions of DASS-21 have been found to have adequate  
27 internal consistency (Cronbach's alpha scores of > 0.7) [18, 19]. DASS-21 has also been  
28 used in Oman and reported to have adequate Cronbach's  $\alpha$  for the three subscales.  
29 The present study used the following cut-offs: Depression  $\geq 10$ ; Anxiety  $\geq 8$ ; Stress  
30  $\geq 16$  [19].  
31  
32  
33  
34  
35  
36  
37  
38  
39  
40

### 41 **Insomnia Severity Index**

42  
43 Insomnia Severity Index (ISI) is a 7-item self-report questionnaire tapping into  
44 the severity of insomnia [20]. Both English and non-English including Arabic versions  
45 of the ISI have been found to have adequate internal reliability (Cronbach's alpha  
46 scores of > 0.7 [21]. A 5-point Likert scale was used to rate each item (e.g., 0 = no  
47 problem; 4 = very severe problem), yielding a total score ranging from 0 to 28. A  
48 previous study suggested that a cut-off score of 14 was deemed adequate for  
49 detecting clinical insomnia with a sensitivity of 82.4% and specificity of 82.1% [22].  
50  
51  
52  
53  
54  
55  
56  
57

### 58 **Demographic factors**

1  
2  
3 The study proforma included socio-demographic data (nationality, gender, age, marital  
4 status), type of medical setting (primary, secondary, tertiary care, or polyclinic) and whether  
5 they were directly engaged in clinical activities such as diagnosing, treating, or providing  
6 nursing care to patients with elevated temperatures or patients with confirmed Covid-19  
7 infection. Those who responded as diagnosing, treating, or providing nursing care were  
8 identified as 'frontline HCWs'. Those participants who had no contact with the units assigned  
9 to handle services for COVID-19 patients were defined to constitute second-line workers or  
10 'non-frontline HCWs'.  
11  
12  
13  
14  
15  
16  
17

18 Participants' job type (physician, nurse, and allied healthcare professional) was also  
19 sought. Allied healthcare professions included pharmacists and other medical staffing  
20 including laboratory technicians. Finally, the participants were also asked whether they had  
21 previously sought consultation for psychiatric disorders ('yes' / 'no').  
22  
23  
24  
25  
26  
27

## 28 **Ethical Issues**

29 This study adhered to the American Association for Public Opinion Research reporting  
30 guidelines [23]. Ethical approval was obtained before the commencement of the study from  
31 the local IRB, Directorate General of Planning and Studies, Centre of Studies and Research,  
32 Ministry of Health (MOH/ DGPS/CSR/20/2311). Written consent was sought from participants  
33 and they were told specifically that their involvement could be terminated if they wish so  
34 without undue consequences. The survey was anonymous, and confidentiality of information  
35 was assured.  
36  
37  
38  
39  
40  
41  
42  
43

## 44 **Statistical Analysis**

45 Data analysis was performed using SPSS statistical software version 23.0 (IBM  
46 Corp). Descriptive statistics were used to explore the profile of the samples in terms of  
47 their demographic and psychological outcomes. Samples were categorized into the  
48 frontline and non-frontline groups. Chi-square, odds ratio, and independent t-tests  
49 were used to compare groups by demographic and psychological factors. All significant  
50 tests were set at 5% alpha level.  
51  
52  
53  
54  
55  
56  
57  
58  
59

## 60 **Patient and Public Involvement**

1  
2  
3 It was not appropriate or possible to involve patients or the public in the design, or conduct,  
4 or reporting, or dissemination plans of our research  
5  
6  
7  
8

## 9 **Results**

10  
11 This cross-sectional study was conducted using an online survey from the 8<sup>th</sup> to  
12 the 17<sup>th</sup> of April in 2020 across different health care services in Oman. In total, we  
13 received 1167 questionnaires of which 28 were determined to be incomplete on  
14 examination. Thus, we only included 1139 records for further analysis.  
15  
16  
17  
18

### 19 **Demographic and psychological outcomes of the study samples**

20  
21 In Table 1, among the 1139 HCWs, 228 (20.0%) are males, and 911 (80.0%) are  
22 females. Their average age was  $36.3 \pm 6.5$  (Mean  $\pm$  SD) and range from 21 to 65 years.  
23 The majority are Omani (n=981, 86.1%) and are married (n=987, 86.9%). A total of 574  
24 (50.4%) were directly involved in diagnosing, treating, and taking care of confirmed or  
25 suspected cases of COVID19 (frontline group). There were 390 (34.2%), 164 (14.4%),  
26 478 (42.0%), and 106 (9.3%) were working in primary, secondary health care, tertiary  
27 health care as well as polyclinics respectively. Among those HCWs, 384 (33.7%), 449  
28 (39.5%), and 305 (26.8) were physicians, nurses, and allied health profession,  
29 respectively. Concerning psychological outcomes, 368 (32.3%), 388 (34.1%), 271  
30 (23.8%), and 211 (18.5%) respondents reported symptoms of depression, anxiety,  
31 stress, and insomnia, respectively while working during the pandemic period.  
32  
33  
34  
35  
36  
37  
38  
39  
40  
41  
42  
43  
44  
45  
46

### 47 **Comparison of frontline and non-frontline staff on demographic and** 48 **psychological outcomes**

49  
50 In Table 1, significant differences were found between the two presently defined  
51 cohorts of HCWs - frontline and non-frontline groups. The frontline group comprised  
52 of members younger in age ( $36.3 \pm 6.5$ ,  $p=0.004$ ) with more of them being non-Omani  
53 (n=94, 59.5%,  $p=0.014$ ), physicians and nurses (n=490, 58.8%,  $p<.001$ ), not married  
54 (n=90, 60.4%,  $p=0.008$ ), handled COVID-19 cases (n=372, 81.2%,  $p<.001$ ), and working  
55  
56  
57  
58  
59  
60

1  
2  
3 in primary health care setting (n=242, 62.1%, p<.001) as compared to the non-frontline  
4 group. With regard to psychological outcomes, members of the frontline group were  
5 1.4 times more likely to have anxiety (OR=1.401, p=0.007) and stress (OR=1.404,  
6 p=0.015) as compared to the non-frontline group. In considering insomnia, the  
7 frontline group was 1.37 times more likely to experience the same (OR=1.377, p=0.037)  
8 as compared to the non-frontline group. No significant differences in depression  
9 status were found between the two groups (p=0.181).  
10  
11  
12  
13  
14  
15  
16  
17

## 18 **Discussion**

19  
20 Various mechanisms to come to grip with the COVID-19 pandemic, including  
21 travel restrictions, quarantines, and curfews which, in turn, have severely disrupted  
22 the social and economic activities of the society, nation, or for that matter the world  
23 [24], have been proposed. While the impact of socio-economic activities due to  
24 COVID-19 has been widely acknowledged in the countries of the Arabian Gulf [25],  
25 what has been overlooked is the fact that healthcare workers (HCWs) are in the  
26 frontline in the COVID-19 pandemic which, in turn, would suggest the importance of  
27 examining their resilience in the light of those challenges.  
28  
29  
30  
31  
32  
33  
34  
35

36 Being a "once-in-a-century pandemic" [26], some of the misgivings affecting  
37 HCWs include the fear of contracting a lethal virus and spreading it to the rest of their  
38 social network, lack of evidence-based prevention and intervention, lack of essential  
39 protective gear and the fact that the pandemic requires protracted shifts with a high  
40 volume of patients with different degrees of pathology and severity [27,28]. This would  
41 imply that HCWs are now working in a uniquely hazardous situation and are thus  
42 vulnerable to stress and distress. In addition to operational stresses, some preliminary  
43 studies have suggested that psychosocial dysfunctions are rife among HCWs [28, 29].  
44 A recent systematic literature review and meta-analysis covering the literature of the  
45 pre-pandemic COVID-19 period suggest that 7.0% to 75.2% of HCWs are burned out  
46 [30]. This huge discrepancy in the prevalence of burnout hinges on country-specific  
47 factors, applied instruments and cut-off-criteria for burnout symptomatology [31]. The  
48  
49  
50  
51  
52  
53  
54  
55  
56  
57  
58  
59  
60

1  
2  
3 prevalence of burnout among HCWs appears to outstrip the general population [32].  
4 Similarly, in addition to burnout, the prevalence of depressive symptoms, anxiety, and  
5 stress among HCWs are also higher than the general population [12,13,14]. However,  
6 since the higher level of stress and distress among HCWs as compared to the general  
7 population has been a trend existing even before the pandemic, it not clear whether  
8 the emerging high level of mental health outcomes owes its onset to COVID-19. One  
9 approach to disentangling this issue is to compare mental health outcomes between  
10 frontline HCWs vs non-frontline HCWs. This study had therefore embarked on the  
11 assessment and comparison of demographic and psychological factors and sleep  
12 status of frontline versus non-frontline HCWs.  
13  
14  
15  
16  
17  
18  
19  
20  
21  
22

23 The present study accrued 1139 HCWs from different parts of the country. As  
24 the HCWs in Oman are predominantly female [33], this study is in line with the  
25 observed 'effeminization' of healthcare as 80.0% of the present participants were  
26 female. Approximately 50% fulfil the present definition of 'frontline HCWs' who, in their  
27 clinical practices, diagnose, treat, and take care of confirmed or suspected cases of  
28 COVID-19 in their respective clinics across the country. The cohort consisted of  
29 physicians, nurses, and allied health professionals.  
30  
31  
32  
33  
34  
35  
36

37 To tap into the levels of depression, anxiety, and stress, the *Depression, Anxiety,*  
38 *and Stress Scale* (DASS-21) was used. Of the present cohort, comprised of both  
39 frontline and non-frontline HCWs, 32.3% endorsed case-ness for depressive  
40 symptoms, 34.1% for anxiety, and 23.8% for stress. In Singapore among HCWs using  
41 DASS-21, Tan et al. [34] have reported 8.9% case-ness for depression, 14.5% for  
42 anxiety, and 6.6% for stress. Using different screening tools, Lai et al. [7] have reported  
43 50.4%, 44.6%, and 71.5% symptoms of depression, anxiety, and distress respectively  
44 among HCWs in Hubei province in China. Lai's study indicated that 34.0% of their  
45 sample had an elevated score of insomnia which appears to be lower compared to the  
46 prevalence of 38.9% among HCWs investigated as part of the studies included in their  
47 systematic review and meta-analysis [29]. Putting these studies together and within  
48 the background of the general population, other than the lower rate of depression in  
49  
50  
51  
52  
53  
54  
55  
56  
57  
58  
59  
60

1  
2  
3  
4  
5  
6  
7  
8  
9  
10  
11  
12  
13  
14  
15  
16  
17  
18  
19  
20  
21  
22  
23  
24  
25  
26  
Singapore, the magnitude of mental health outcomes appears to be higher among HCWs when compared to the general population. In the general population, the prevalence of depression, anxiety, and insomnia have been estimated to be 11.1% [12], 5.3%, 7.3% [13], and 10% - 30% [14] respectively. Low mental health outcomes among HCWs in Oman and Singapore could be attributed to the preparedness phase the country underwent as the first cases were registered much later than when the World Health organization declared COVID-19 a global pandemic [1]. While studies on the status of mental health outcomes and sleep status have been forthcoming from different parts of the world, many of them are single-center [8] and regional studies [7] with some of the catchment areas not being defined [34]. A study with a nationally representative sample of HWCs taking into account both the frontline and non-frontline are therefore warranted.

27  
28  
29  
30  
31  
32  
33  
34  
35  
36  
37  
38  
39  
40  
41  
42  
43  
44  
45  
46  
47  
48  
The second aim of the present study was to compare demographic and psychological outcomes among frontline and non-frontline HCWs. The present data suggest that frontline HCWs are likely to be younger, single, physicians or nurses working in primary healthcare and are required to handle COVID-19 cases. The majority of frontline HCWs were non-Omani, a trend that is worth contemplating. Despite the effort to 'Omanize' the healthcare infrastructure, foreign nationals still form the bulk of HCWs in Oman [35]. The COVID-19 pandemic has resulted in travel restrictions and an expected economic recession, resultant job security, and being cut off from their country of origin for the migrant population [36]. It remains to be seen whether these factors have rendered non-Omani HCWS to be more vulnerable to the presently observed mental health outcomes.

49  
50  
51  
52  
53  
54  
55  
56  
57  
58  
59  
60  
In psychological outcomes, compared to non-frontline HCWs, frontline HCWs were more likely to endorse anxiety symptoms and stress. A similar trend was observed with insomnia. Interestingly, the depressive symptoms did not emerge as being significant in the equation employed to differentiate between frontline vs non-frontline HCWs. Oman is characterized by a collectivistic society that is in direct contrast to western individualistic societies [37]. In such a society, anxiety symptoms

1  
2  
3 ('I experienced trembling in the hands') and stress ('I felt that I was using a lot of  
4 nervous energy') tend to be perceived to be a veneer of physical symptoms and are  
5 therefore likely to be endorsed. In contrast, depressive symptoms ('I felt down-hearted  
6 and blue') are thought to be more of a weakness of character than a manifestation of  
7 'disease'. As psychological outcomes are increasingly recognized to emerge as a  
8 consequence of COVID-19 [11], more studies are needed to decipher the culturally-  
9 specific idioms of distress intimately tied to mental health outcomes during the  
10 pandemic.  
11  
12  
13  
14  
15  
16  
17  
18  
19  
20  
21  
22

### 23 **Limitations**

24 Most psychosocial studies of this nature tend to have many limitations owing to the  
25 amorphous variables under scrutiny. Firstly, conducting a national wide survey requires proper  
26 logistics which was not feasible during the lockdown. An online survey is known to marred by  
27 the fact that it tends to accrue a selective population who are technologically savvy and more  
28 familiar with the evolving 'internet culture' [38]. Notwithstanding such a view, this study  
29 appears to have reached its targeted population based on the estimated sample size. Oman  
30 has established that > 71% of the total population (4.6 million) has access to internet services  
31 [38]. Secondly, DASS-21 and ISI are no match for the 'gold-standard' interviews such as those  
32 that follow the *Diagnostic and Statistical Manual of Mental Disorders* and World Health  
33 Organization *Composite International Diagnostic Interview* (CIDI). However, quick symptom  
34 checklists such as DAS-21 and ISI are the only viable tools to conduct such a study given the  
35 current circumstances [7]. Lastly, time factors are also considered important for quantifying  
36 the presence of psychological disorders. Within this view, it not clear whether the observed  
37 mental health outcomes constitute adjustment disorders/ acute stress reaction or present a  
38 chronic-type and thus irreversible psychological distress. Follow-up studies in this regard are  
39 therefore warranted.  
40  
41  
42  
43  
44  
45  
46  
47  
48  
49  
50  
51  
52  
53  
54

### 55 **Conclusion:**

56 COVID-19, a new strain among the class of Coronavirus, has recently gripped  
57 all corners of the world triggering a global public health emergency. Within the  
58  
59  
60

1  
2  
3 background of high rates of poor coping among HCWs even before the pandemic,  
4 studies are needed to explore how frontline HCWs fare compared to non-frontline  
5 HCWs in this regard. This study highlighted and appeared to be congruent with other  
6 studies in suggesting that the COVID-19 outbreak has triggered a higher rate of  
7 depressive symptoms, anxiety, and insomnia among HCWs. In comparing frontline and  
8 non-frontline HCWs, the present data suggested that frontline HCWs were likely to be  
9 younger non-Omani physicians or nurses who were single, and working in primary  
10 healthcare. It is therefore paramount to offer timely psychological intervention for the  
11 HCWs to promote coping and resilience among these vulnerable HCWs.  
12  
13  
14  
15  
16  
17  
18  
19  
20  
21  
22  
23  
24

## ARTICLE INFORMATION

25  
26  
27 **Corresponding Authors:** Dr. Samir Al-Adawi, Department of Behavioral Medicine,  
28 College of Medicine & Health Sciences, Sultan Qaboos University, P.O. Box 35, Al  
29 Khoudh 123, Muscat, Oman (samir.al-adawi@fulbrightmail.org)  
30  
31

32 Al Masarra Hospital, Ministry of Health, Wilayat Al Amerat, Muscat (**Alshekaili M.,**  
33 **Hassan W., Al-Said N., alsulimani F.**); Centre of Studies & Research, Directorate  
34 General Planning and studies, Ministry of Health, Oman (**Kumar S., Al-Mawali A.**);  
35 Department of Family Medicine & Public Health, Sultan Qaboos University, Muscat,  
36 Oman(**Chan, Moon Fai**); Department of Behavioral Medicine, Sultan Qaboos  
37 University Hospital, Muscat, Oman (Mahadevan **S., Al-Adawi S.**)  
38  
39  
40

41 **Author Contributions:** Drs Muna Alshekaili, Walid Hassan, Nazik Al-Said, Fatima  
42 alsulimani and Satish Kumar had full access to all of the data in the study and take  
43 responsibility for the integrity of the data and the accuracy of the data analysis.  
44  
45  
46

47 **Concept and design:** Muna Alshekaili, Samir Al-Adawi.  
48

49 **Acquisition, analysis, or interpretation of data:** Muna Alshekaili, Walid Hassan,  
50 Satish Kumar, Adhra Al-Mawali, , Moon Fai Chan  
51  
52

53 **Drafting of the manuscript:** Muna Alshekaili, Walid Hassan, Samir Al-Adawi.  
54  
55

56 **Critical revision of the manuscript for important intellectual content:** Samir Al-  
57 Adawi, Sangeetha Mahadevan, Moon Fai Chan  
58  
59  
60



1  
2  
3 **Statistical analysis:** Walid Hassan, Moon Fai Chan  
4

5  
6 **Administrative, technical, or material support:** Satish Kumar, Adhra Al-Mawali,  
7

8 **Supervision:** Muna Alshekaili, Walid Hassan.  
9

10  
11 **Conflict of Interest Disclosures:** None reported.  
12

13  
14 **Funding/Support:** This research received no specific grant from any funding agency  
15 in the public, commercial or not-for-profit sectors.  
16

17  
18  
19 **Additional Contributions:** We thank all the participants who contributed to our  
20 work.  
21

22  
23 **Data Statement:** All data generated and analysed during this study are included as  
24 part of this article.  
25

## 26 27 28 29 **References**

- 30  
31 1. Balkhair AA. COVID-19 Pandemic: A New Chapter in the History of Infectious  
32 Diseases. Oman Medical Journal. 2020 Mar;35(2):e123.  
33  
34 2. The Arabian Stories. Coronavirus: Omanis banned from leaving the country. March  
35 18, 2020 [https://www.thearabianstories.com/2020/03/18/coronavirus-omanis-](https://www.thearabianstories.com/2020/03/18/coronavirus-omanis-banned-from-leaving-the-country/)  
36 [banned-from-leaving-the-country/](https://www.thearabianstories.com/2020/03/18/coronavirus-omanis-banned-from-leaving-the-country/)  
37  
38 3. Oman Observer. Oman reports 463 new cases, total 7,257. 23/05/2020.  
39 <https://www.omanobserver.om/oman-reports-463-new-cases-total-7257/>  
40  
41 4. de Kloet E, Joëls M. Mineralocorticoid Receptors and Glucocorticoid Receptors in HPA  
42 Stress Responses During Coping and Adaptation. Oxford Research Encyclopedia of  
43 Neuroscience, 2020. Retrieved 23 May. 2020, from  
44 [https://oxfordre.com/neuroscience/view/10.1093/acrefore/9780190264086.001.0001/](https://oxfordre.com/neuroscience/view/10.1093/acrefore/9780190264086.001.0001/acrefore-9780190264086-e-266)  
45 [acrefore-9780190264086-e-266](https://oxfordre.com/neuroscience/view/10.1093/acrefore/9780190264086.001.0001/acrefore-9780190264086-e-266).  
46  
47 5. Barranco R, Ventura F. Covid-19 and infection in health-care workers: An emerging  
48 problem [published online ahead of print, 2020 May 22]. Med Leg J.  
49 2020;25817220923694. doi:10.1177/0025817220923694.  
50  
51 6. Jin YH, Huang Q, Wang YY, et al. Perceived infection transmission routes, infection  
52 control practices, psychosocial changes, and management of COVID-19 infected  
53 healthcare workers in a tertiary acute care hospital in Wuhan: a cross-sectional  
54 survey. Mil Med Res. 2020;7(1):24. Published 2020 May 11. doi:10.1186/s40779-020-  
55 00254-8.  
56  
57  
58  
59  
60

- 1  
2  
3  
4  
5 7. Lai J, Ma S, Wang Y, et al. Factors Associated With Mental Health Outcomes Among  
6 Health Care Workers Exposed to Coronavirus Disease 2019. *JAMA Netw Open*.  
7 2020;3(3):e203976. Published 2020 Mar 2. doi:10.1001/jamanetworkopen.2020.3976.  
8  
9
- 10 8. Badahdah AM, Khamis F, Mahyijari NA. The psychological well-being of physicians  
11 during COVID-19 outbreak in Oman [published online ahead of print, 2020 May  
12 6]. *Psychiatry Res*. 2020;289:113053. doi:10.1016/j.psychres.2020.113053.  
13  
14
- 15 9. Shah K, Kamrai D, Mekala H, Mann B, Desai K, Patel RS. Focus on mental health  
16 during the coronavirus (COVID-19) pandemic: applying learnings from the past  
17 outbreaks. *Cureus*. 2020 Mar;12(3).  
18  
19
- 20 10. Wang C, Pan R, Wan X, Tan Y, Xu L, Ho CS, Ho RC. Immediate psychological  
21 responses and associated factors during the initial stage of the 2019 coronavirus  
22 disease (COVID-19) epidemic among the general population in china. *International*  
23 *Journal of Environmental Research and Public Health*. 2020 Jan;17(5):1729.  
24  
25
- 26 11. Holmes EA, O'Connor RC, Perry VH, et al. Multidisciplinary research priorities for the  
27 COVID-19 pandemic: a call for action for mental health science. *Lancet Psychiatry*.  
28 2020;7(6):547-560. doi:10.1016/S2215-0366(20)30168-1.  
29  
30  
31
- 32 12. Bromet E, Andrade LH, Hwang I, et al. Cross-national epidemiology of DSM-IV  
33 major depressive episode. *BMC Med*. 2011;9:90. doi:10.1186/1741-7015-9-90.  
34  
35  
36
- 37 13. Baxter AJ, Scott KM, Vos T, Whiteford HA. Global prevalence of anxiety disorders: a  
38 systematic review and meta-regression. *Psychol Med*. 2013;43(5):897-910.  
39 doi:10.1017/S003329171200147X.  
40  
41  
42
- 43 14. Roth T. Insomnia: definition, prevalence, etiology, and consequences. *J Clin Sleep*  
44 *Med*. 2007;3(5 Suppl): S7-S10.  
45  
46
- 47 15. Mataria A, Hajjeh R, Al-Mandhari A. Surviving or thriving in the Eastern  
48 Mediterranean region: the quest for universal health coverage during conflict. *Lancet*.  
49 2020;395(10217):13-15. doi:10.1016/S0140-6736(19)33061-2.  
50  
51
- 52 16. Al Riyami A, Elaty MA, Morsi M, Al Kharusi H, Al Shukaily W, Jaju S. Oman world  
53 health survey: part 1 - methodology, sociodemographic profile and epidemiology of  
54 non-communicable diseases in oman. *Oman Med J*. 2012;27(5):425-443.  
55  
56
- 57 17. Lee AM, Wong JG, McAlonan GM, et al. Stress and psychological distress among  
58 SARS survivors 1 year after the outbreak. *Can J Psychiatry*. 2007;52(4):233-240.  
59 doi:10.1177/070674370705200405.  
60

- 1  
2  
3  
4  
5 18. Moussa MT, Lovibond P, Laube R, Megahead HA. Psychometric properties of an  
6 arabic version of the depression anxiety stress scales (DASS). *Research on Social Work*  
7 *Practice*. 2017 May;27(3):375-86.  
8  
9  
10 19. Lee J, Lee EH, Moon SH. Systematic review of the measurement properties of the  
11 Depression Anxiety Stress Scales-21 by applying updated COSMIN methodology.  
12 *Qual Life Res*. 2019;28(9):2325-2339. doi:10.1007/s11136-019-02177-x.  
13  
14  
15 20. Morin CM. *Insomnia: Psychological assessment and management*. New York: Guilford  
16 Press; 1993.  
17  
18  
19  
20 21. Suleiman KH, Yates BC. Translating the insomnia severity index into Arabic. *Journal of*  
21 *Nursing Scholarship*. 2011 Mar;43(1):49-53.  
22  
23  
24 22. Gagnon C, Bélanger L, Ivers H, Morin CM. Validation of the Insomnia Severity Index in  
25 primary care. *J Am Board Fam Med*. 2013 Nov-Dec;26(6):701-10. doi:  
26 10.3122/jabfm.2013.06.130064.  
27  
28  
29  
30 23. American Association for Public Opinion Research (AAPOR) reporting guideline.  
31 [https://www.aapor.org/Publications-Media/AAPOR-Journals/Standard-](https://www.aapor.org/Publications-Media/AAPOR-Journals/Standard-Definitions.aspx)  
32 [Definitions.aspx](https://www.aapor.org/Publications-Media/AAPOR-Journals/Standard-Definitions.aspx).  
33  
34  
35  
36 24. Bedford J, Enria D, Giesecke J, et al. COVID-19: towards controlling of a  
37 pandemic. *Lancet*. 2020;395(10229):1015-1018. doi:10.1016/S0140-6736(20)30673-5.  
38  
39  
40  
41 25. Country/Territory Report - Oman.; 2020:1-49.  
42 <http://ezproxysrv.squ.edu.om:2127/login.aspx?direct=true&db=awr&AN=143036153>  
43 [&site=ehost-live&scope=site](http://ezproxysrv.squ.edu.om:2127/login.aspx?direct=true&db=awr&AN=143036153). Accessed May 29, 2020.  
44  
45  
46  
47 26. Gates B. Responding to Covid-19 - A Once-in-a-Century Pandemic?. *N Engl J Med*.  
48 2020;382(18):1677-1679. doi:10.1056/NEJMp2003762  
49  
50  
51 27. Senni M. COVID-19 experience in Bergamo, Italy. *Eur Heart J*. 2020;0:1-2. doi:  
52 10.1093/eurheartj/ehaa279  
53  
54  
55  
56 28. Huang J, Liu F, Teng Z, et al. Care for the psychological status of frontline medical  
57 staff fighting against COVID-19 [published online ahead of print, 2020 Apr 3]. *Clin*  
58 *Infect Dis*. 2020;ciaa385. doi:10.1093/cid/ciaa385.  
59  
60

- 1  
2  
3  
4  
5  
6  
7  
8  
9  
10  
11  
12  
13  
14  
15  
16  
17  
18  
19  
20  
21  
22  
23  
24  
25  
26  
27  
28  
29  
30  
31  
32  
33  
34  
35  
36  
37  
38  
39  
40  
41  
42  
43  
44  
45  
46  
47  
48  
49  
50  
51  
52  
53  
54  
55  
56  
57  
58  
59  
60
29. Pappa S, Ntella V, Giannakas T, Giannakoulis VG, Papoutsis E, Katsaounou P. Prevalence of depression, anxiety, and insomnia among healthcare workers during the COVID-19 pandemic: A systematic review and meta-analysis [published online ahead of print, 2020 May 8]. *Brain Behav Immun*. 2020;S0889-1591(20)30845-X. doi:10.1016/j.bbi.2020.05.026.
  30. Erschens R, Keifenheim KE, Herrmann-Werner A, et al. Professional burnout among medical students: Systematic literature review and meta-analysis. *Med Teach*. 2019;41(2):172-183. doi:10.1080/0142159X.2018.1457213.
  31. Rotenstein LS, Torre M, Ramos MA, et al. Prevalence of Burnout Among Physicians: A Systematic Review. *JAMA*. 2018;320(11):1131-1150. doi:10.1001/jama.2018.12777
  32. Dyrbye LN, West CP, Satele D, et al. Burnout among U.S. medical students, residents, and early career physicians relative to the general U.S. population. *Acad Med*. 2014;89(3):443-451. doi:10.1097/ACM.000000000000134.
  33. Mohamed NA, Abdulhadi NN, Al-Maniri AA, Al-Lawati NR, Al-Qasmi AM. The trend of feminization of doctors' workforce in Oman: is it a phenomenon that could rouse the health system?. *Hum Resour Health*. 2018;16(1):19. doi:10.1186/s12960-018-0283-y.
  34. Tan BYQ, Chew NWS, Lee GKH, et al. Psychological Impact of the COVID-19 Pandemic on Health Care Workers in Singapore [published online ahead of print, 2020 Apr 6]. *Ann Intern Med*. 2020; M20-1083. doi:10.7326/M20-1083
  35. Emerson C. Localization of the Nursing Workforce in the Sultanate of Oman. *Case Studies in Global Health Policy Nursing*. 2018 Jun 28:85.
  36. Liem A, Wang C, Wariyanti Y, Latkin CA, Hall BJ. The neglected health of international migrant workers in the COVID-19 epidemic. *The Lancet Psychiatry*. 2020 Apr 1;7(4): e20.
  37. Al-Adawi S. Adolescence in Oman. In Jeffrey Jensen Arnett, Editor. *International Encyclopedia of Adolescence: A Historical and Cultural Survey of Young People around the World* (2 Volume Set). New York: Routledge, 2006, pp.713-828.
  38. Belwal R, Al Shibli R, Belwal S. Consumer protection and electronic commerce in the Sultanate of Oman. *Journal of Information, Communication and Ethics in Society*. 2020 <https://doi.org/10.1108/JICES-09-2019-0110>. **38**.

**Table 1. Comparison of the frontline with non-frontline staff in association of demographic and psychological factors during the impacts of COVID-19 in Oman**

| Variables                                          |               | Total<br>(n=1139) | Frontline HCWs | Non-frontline<br>HCWs | Statistics <sup>a</sup> p-value |        |
|----------------------------------------------------|---------------|-------------------|----------------|-----------------------|---------------------------------|--------|
|                                                    |               |                   | Yes (n=574)    | No (n=565)            |                                 |        |
|                                                    |               | n (%)             | n (%)          | n (%)                 |                                 |        |
| <b><i>Socio-demographics factors</i></b>           |               |                   |                |                       |                                 |        |
| Age (Years)                                        | Mean ± SD     | 36.3 ± 6.5        | 35.8 ± 6.1     | 36.9 ± 6.8            | 2.884 <sup>b</sup>              | 0.004  |
| Gender                                             | Male          | 228 (20.0)        | 102 (44.7)     | 126 (55.3)            | 3.651                           | 0.056  |
|                                                    | Female        | 911 (80.0)        | 472 (51.8)     | 439 (48.2)            |                                 |        |
| Nationality                                        | Omani         | 981 (86.1)        | 480 (48.9)     | 501 (51.1)            | 6.075                           | 0.014  |
|                                                    | Non-Omani     | 158 (13.9)        | 94 (59.5)      | 64 (40.5)             |                                 |        |
| Healthcare type                                    | Physician     | 384 (33.7)        | 229 (59.6)     | 155 (40.4)            | 87.586                          | <0.001 |
|                                                    | Nurse         | 449 (39.5)        | 261 (58.1)     | 188 (41.9)            |                                 |        |
|                                                    | Allied health | 305 (26.8)        | 84 (27.5)      | 221 (72.5)            |                                 |        |
| Previous sought mental health consultation         | No            | 1013 (89.3)       | 512 (50.5)     | 501 (49.5)            | 0.013                           | 0.910  |
|                                                    | Yes           | 122 (10.7)        | 61 (50.0)      | 61 (50.0)             |                                 |        |
| Marital status                                     | Not married   | 149 (13.1)        | 90 (60.4)      | 59 (39.6)             | 6.930                           | 0.008  |
|                                                    | Married       | 987 (86.9)        | 482 (48.8)     | 505 (51.2)            |                                 |        |
| Number of COVID-19 cases were handled <sup>+</sup> | No            | 679 (59.7)        | 200 (29.5)     | 479 (70.5)            | 293.203                         | <0.001 |
|                                                    | Yes           | 458 (40.3)        | 372 (81.2)     | 86 (18.8)             |                                 |        |
|                                                    | 1-5 cases     | 312 (68.1)        | 254 (81.4)     | 58 (18.6)             | 0.023                           | 0.881  |
|                                                    | 6+ cases      | 146 (31.9)        | 118 (80.8)     | 28 (19.2)             |                                 |        |
| Type of healthcare                                 | Primary       | 390 (34.3)        | 242 (62.1)     | 148 (37.9)            | 44.884                          | <0.001 |
|                                                    | Secondary     | 164 (14.4)        | 70 (42.7)      | 94 (57.3)             |                                 |        |

|                                                                                    |            |            |             |            |                    |       |
|------------------------------------------------------------------------------------|------------|------------|-------------|------------|--------------------|-------|
|                                                                                    | Tertiary   | 478 (42.0) | 231 (48.3)  | 247 (51.7) |                    |       |
|                                                                                    | Polyclinic | 106 (9.3)  | 31 (29.2)   | 75 (70.8)  |                    |       |
| <b>Psychological symptoms</b>                                                      |            |            |             |            |                    |       |
| DASS - Depression                                                                  | Yes        | 368 (32.3) | 196 (53.3)  | 172 (46.7) | 1.185 <sup>c</sup> | 0.181 |
|                                                                                    | No         | 771 (67.7) | 378 (49.0)  | 393 (51.0) |                    |       |
| DASS - Anxiety                                                                     | Yes        | 388 (34.1) | 217 (55.9)  | 171 (44.1) | 1.401 <sup>c</sup> | 0.007 |
|                                                                                    | No         | 751 (65.9) | 357 (47.5)  | 394 (52.5) |                    |       |
| DASS - Stress                                                                      | Yes        | 271 (23.8) | 154 (56.98) | 117 (43.2) | 1.404 <sup>c</sup> | 0.015 |
|                                                                                    | No         | 868 (76.2) | 420 (48.4)  | 448 (51.6) |                    |       |
| <b>Vegetative symptoms</b>                                                         |            |            |             |            |                    |       |
| Insomnia                                                                           | Yes        | 211 (18.5) | 120 (56.9)  | 91 (43.1)  | 1.377 <sup>c</sup> | 0.037 |
|                                                                                    | No         | 928 (81.5) | 454 (48.9)  | 474 (51.1) |                    |       |
| a, Chi-square; b, t statistic; c, Odds Ratio; +, 2 missing records                 |            |            |             |            |                    |       |
| DASS, The Depression, Anxiety, and Stress Scale (DASS-21); Insomnia Severity Index |            |            |             |            |                    |       |

# BMJ Open

## Factors associated with Mental Health Outcomes across healthcare settings in Oman during COVID19: Frontline versus Non-frontline Healthcare Workers

|                                 |                                                                                                                                                                                                                                                                                                                                                                                                                                                                                                                                                                                                                                                                         |
|---------------------------------|-------------------------------------------------------------------------------------------------------------------------------------------------------------------------------------------------------------------------------------------------------------------------------------------------------------------------------------------------------------------------------------------------------------------------------------------------------------------------------------------------------------------------------------------------------------------------------------------------------------------------------------------------------------------------|
| Journal:                        | <i>BMJ Open</i>                                                                                                                                                                                                                                                                                                                                                                                                                                                                                                                                                                                                                                                         |
| Manuscript ID                   | bmjopen-2020-042030.R1                                                                                                                                                                                                                                                                                                                                                                                                                                                                                                                                                                                                                                                  |
| Article Type:                   | Original research                                                                                                                                                                                                                                                                                                                                                                                                                                                                                                                                                                                                                                                       |
| Date Submitted by the Author:   | 30-Aug-2020                                                                                                                                                                                                                                                                                                                                                                                                                                                                                                                                                                                                                                                             |
| Complete List of Authors:       | Alshekaili , Muna ; Al Masarra Hospital<br>Hassan , Walid ; Al Massarah Hospital<br>Al Said , Nazik; Al Massarah Hospital<br>Alsulaimani , Fatima; Al Massarah Hospital<br>Kumar, Satish; Ministry of Health Oman<br>Al-Mawali, Adhra; Ministry of Health Oman, Centre of Studies & Research; Ministry of Health<br>Chan , Moon ; Sultan Qaboos University College of Medicine and Health Science, Family Medicine & Public Health<br>Mahadevan, Sangeetha; Sultan Qaboos University College of Medicine and Health Science, Behavioral Medicine<br>Al-Adawi, Samir; Sultan Qaboos University College of Medicine and Health Science, Department of Behavioral Medicine |
| <b>Primary Subject Heading</b>: | Mental health                                                                                                                                                                                                                                                                                                                                                                                                                                                                                                                                                                                                                                                           |
| Secondary Subject Heading:      | Mental health, Epidemiology                                                                                                                                                                                                                                                                                                                                                                                                                                                                                                                                                                                                                                             |
| Keywords:                       | Quality in health care < HEALTH SERVICES ADMINISTRATION & MANAGEMENT, Anxiety disorders < PSYCHIATRY, Depression & mood disorders < PSYCHIATRY, Public health < INFECTIOUS DISEASES                                                                                                                                                                                                                                                                                                                                                                                                                                                                                     |
|                                 |                                                                                                                                                                                                                                                                                                                                                                                                                                                                                                                                                                                                                                                                         |

SCHOLARONE™  
Manuscripts



I, the Submitting Author has the right to grant and does grant on behalf of all authors of the Work (as defined in the below author licence), an exclusive licence and/or a non-exclusive licence for contributions from authors who are: i) UK Crown employees; ii) where BMJ has agreed a CC-BY licence shall apply, and/or iii) in accordance with the terms applicable for US Federal Government officers or employees acting as part of their official duties; on a worldwide, perpetual, irrevocable, royalty-free basis to BMJ Publishing Group Ltd ("BMJ") its licensees and where the relevant Journal is co-owned by BMJ to the co-owners of the Journal, to publish the Work in this journal and any other BMJ products and to exploit all rights, as set out in our [licence](#).

The Submitting Author accepts and understands that any supply made under these terms is made by BMJ to the Submitting Author unless you are acting as an employee on behalf of your employer or a postgraduate student of an affiliated institution which is paying any applicable article publishing charge ("APC") for Open Access articles. Where the Submitting Author wishes to make the Work available on an Open Access basis (and intends to pay the relevant APC), the terms of reuse of such Open Access shall be governed by a Creative Commons licence – details of these licences and which [Creative Commons](#) licence will apply to this Work are set out in our licence referred to above.

Other than as permitted in any relevant BMJ Author's Self Archiving Policies, I confirm this Work has not been accepted for publication elsewhere, is not being considered for publication elsewhere and does not duplicate material already published. I confirm all authors consent to publication of this Work and authorise the granting of this licence.



## Factors associated with Mental Health Outcomes across healthcare settings in Oman during COVID19: Frontline versus Non-frontline Healthcare Workers

Muna Alshekaili<sup>1</sup>, Walid Hassan<sup>1</sup>, Nazik Al-Said<sup>1</sup>, Fatima Alsulaimani<sup>1</sup>, Satish Kumar<sup>2</sup>, Adhra Al-Mawali<sup>2</sup>, Moon Fai Chan<sup>3</sup>, Sangeetha Mahadevan<sup>4</sup>, Samir Al-Adawi<sup>4</sup>

<sup>1</sup> Al Masarra Hospital, Ministry of Health, Wilayat Al Amerat, Muscat, Oman

<sup>2</sup> Centre of Studies & Research, Directorate General Planning, and studies, Ministry of Health, Oman

<sup>3</sup> Department of Family Medicine & Public Health, College of Medicine & Health Sciences Sultan Qaboos University, Muscat, Oman

<sup>4</sup>Department of Behavioral Medicine, College of Medicine & Health Sciences, Sultan Qaboos University, Muscat, Oman

### Corresponding author

Dr. Samir Al-Adawi

Department of Behavioral Medicine, College of Medicine & Health Sciences

Sultan Qaboos University

P.O. Box 35, P.C. 123

Al Khoudh, Muscat, Sultanate of Oman

Phone : (+968) 2414 -1139

Mobile : (+ 968) 9938 -0246

Fax : (+ 968) 2441 -3419

Email: [samir.al-adawi@fulbrightmail.org](mailto:samir.al-adawi@fulbrightmail.org)

### All Authors' emails

Muna Alshekaili [m.alshekaili@gmail.com]

Walid Hassan [brahimw@mymail.vcu.edu]

Nazik Al Said [alsaidnazik@gmail.com]

Fatima Alsulaimani [um-alkhalil@hotmail.com]

Sathish Kumar Jayapal [[sathish.kumar@moh.gov.om](mailto:sathish.kumar@moh.gov.om)]

Adhra Al-Mawali [adhra.almawali@gmail.com]

Moon Fai Chan [moonf@squ.edu.om]

Sangeetha Mahadevan [sm5520@nyu.edu]

Samir Al-Adawi [[samir.al-adawi@fulbrightmail.org](mailto:samir.al-adawi@fulbrightmail.org)]

**Short Title: Mental Health Outcomes of HCWs in Oman during COVID19**

**Word count: 3,220**

## Abstract

### OBJECTIVE:

This study aims to assess and compare demographic and psychological factors and sleep status of frontline healthcare workers (HCWs) in relation to non-frontline HCWs.

### DESIGN, SETTINGS, PARTICIPANTS AND OUTCOMES

This cross-sectional study was conducted from the 8<sup>th</sup> to the 17<sup>th</sup> of April 2020 using an online survey across varied health care settings in Oman accruing 1139 HCWS.

The primary and secondary outcomes were mental health status and socio-demographic data, respectively. Mental health status was assessed using *Depression, Anxiety, and Stress Scales* (DASS-21), and insomnia was evaluated by the *Insomnia Severity Index* (ISI). Samples were categorized into the frontline and non-frontline groups. Chi-square and t-tests were used to compare groups by demographic data. The Mantel-Haenszel odds ratio was used to compare groups by mental health outcomes adjusted by all socio-demographic factors.

### RESULTS

This study included 1139 HCWs working in Oman. While working during the pandemic period, a total of 368 (32.3%), 388 (34.1%), 271 (23.8%), and 211 (18.5%) respondents were reported to have depression, anxiety, stress, and insomnia, respectively. HCWs in the frontline group were 1.5 times more likely to report anxiety (OR=1.557, p=0.004) stress (OR=1.506, p=0.016) and insomnia (OR=1.586, p=0.013) as compared to those in the non-frontline group. No significant differences in depression status were found between the frontline and non-frontline groups (p=0.201).

### CONCLUSIONS

To our knowledge, this is the first study to explore the differential impacts of the COVID-19 pandemic on different grades of HCWs. This study suggests that frontline HCWs are disproportionately affected compared to non-frontline HCWs, with managing sleep-wake cycles and anxiety symptoms being highly endorsed among frontline HCWs. As psychosocial interventions are likely to be constrained owing to the pandemic, mental health care must first be directed to frontline HCWs.

Keywords: Frontline Health Care Workers; COVID-19; Depression; Anxiety; Insomnia; The depression, Anxiety and Stress Scale; Insomnia Severity Index; Oman

## Article Summary

### Methods

- The study accrued 1139 participants of which 574 were working as frontline HCWs (565 non-frontline workers) serving patients with COVID-19 in different categories of healthcare settings in Oman.
- The following tools used were used alongside the collection of demographic information: The depression, Anxiety and Stress Scale (DASS-21) and Insomnia Severity Index.
- Strengths: This nationally representative study is the first of its kind to investigate the differences in magnitude and the covariates of stress and distress between frontline and non-frontline healthcare workers in Oman.
- Limitations: The use of an online survey and the use of symptom checklists (DASS, ISI) which are typically no match for the 'gold-standard' interviews.
- It is also not clear whether the observed mental health outcomes constitute adjustment disorders/ acute stress reaction or present a chronic-type and thus irreversible psychological distress.

**INTRODUCTION:**

COVID-19, a new strain among the class of corona-virus, has been reported to have first manifested in humans in December 2019, subsequently triggering a global pandemic [1]. Among the countries affected, specifically in the Arabian Gulf, is Oman. On February 24<sup>th</sup>, 2020, Oman reported its first two cases testing positive for COVID-19. The initial report implicated the spread of COVID-19 in Oman via citizens who had travelled abroad [2]. More recently, the Ministry of Health (MoH) has reported an increasing number of people being diagnosed with COVID-19 with a few deaths and multiple recoveries [3]. On April 11, the results of mass testing by the MoH indicated approximately 500 cases per day that were confirmed to have COVID-19. This trend gradually showed only an upward trend with numbers surging up to over 1000 confirmed cases per day, indicating an increased number of cases who were becoming critically ill with some of them losing their lives [4,5]. With the ever-growing number of confirmed and suspected cases, the workload of healthcare workers (HCWs) has been overwhelming. The long and irregular hours of such continuous and heavy volumes of work have the potential to trigger stress and distress.

Empirical evidence suggests that stress associated with a period of tribulation tends to weaken the immune system, further increasing the risk of diseases [6]. Given this fact, in addition to having a high risk of contracting COVID-19, partly attributed to suboptimal protection [7,8], HCWs are prone to poor mental health outcomes [9,10]. Therefore, early detection among HCWs has the potential to 'pre-empt' the development of intransigent, and an advanced pathology of mental health outcomes, thereby helping to reduce the less desirable trend of having compromised HCWs during a pandemic.

The prevalence of stress and distress during times of great tribulation and seismic political, social and economic situations have been extensively investigated [11]. Studies have shown a significant peak of poor coping, maladjustment and the development of emotional disorders in the wake of such unpredictable times [12]. With the current global pandemic of COVID-19, Holmes et al. [13] have emphasized the importance of giving priority to all three tiers of social, psychological, and biological health. As stress and distress have commonly been reported among healthcare workers, often outshining the rate observed in the general population [14-16], the question remains whether there are differences in magnitude and the covariates of stress and distress among those working on the frontlines and those who are not. This hypothesis has received scant attention.

1  
2  
3 While impressionistic reports on the psychosocial issues among healthcare workers  
4 have emerged in Oman [10], there is the dearth of studies that address these issues among a  
5 nationally-representative sample of healthcare workers. This study from Oman aims to fill this  
6 gap in the existing literature. Thus, this study assessed and compared the demographic and  
7 psychological factors and sleep status of frontline HCWs vs non-frontline HCWs.  
8 Understanding demographic factors that have the potential to tamper with relevant  
9 preventative measures and knowing if their magnitude is higher among frontline HCWs will  
10 help inform the urgent mechanisms that are needed to preserve the wellbeing and resilience  
11 of such subtypes of HCWs [13].  
12  
13  
14  
15  
16  
17  
18  
19  
20  
21

## 22 **Methods**

### 23 **Setting and Participants**

24 This cross-sectional study was conducted from 8<sup>th</sup> April to 17<sup>th</sup> April 2020 across varied  
25 health care settings in the country. Oman has a universal free healthcare system and is divided  
26 into primary, secondary, tertiary, and poly- clinics [17]. According to the MoH of Oman, the  
27 first point of contact with healthcare is primary healthcare. If the service seeker should require  
28 secondary or tertiary care, then they are referred or transported to the relevant catchment  
29 areas with secondary or tertiary care services.  
30  
31  
32  
33  
34  
35

36 With persisting social distancing, the study proforma was disseminated using emails of  
37 representative HCWs working in different regions of the country [18]. The inclusion criteria  
38 consisted of the HCW workers designated to work in healthcare setting that dispense care for  
39 people with COVID-19. In Oman, HCWs generally work across three settings: MoH,  
40 Governmental Non-MoH sector and Private sectors. The present HCWs constitute only those  
41 affiliated with the MoH. The HCWs who were quarantined/on leave or did not provide  
42 informed consent for the present study or provided incomplete responses were all excluded.  
43  
44  
45  
46  
47  
48

49 Oman has eleven administrative regions known as governorates or *muhafazah* [18].  
50 Concerted efforts were made to accrue participants from all such regions in the country. One  
51 relevant clinical department was randomly sampled from each chosen healthcare setting, and  
52 all HCWs in this department were asked to participate in this study. This study randomly  
53 selected one department under MoH from each governorate. According to the manpower  
54 statistics from the MoH in 2018, there are 39303 HCWs under MoH, so around 3573 (39303/11)  
55 HCWs worked for each governorate. In each governorate, there were about 9  
56  
57  
58  
59  
60

1  
2  
3 units/departments, with about 397 HCWs (3573/9) working in each department. Hence, in  
4 total, 4367 HCWs (397 x 11) were sent the online survey and the resulting response rate stood  
5 at  $1167/4367=26.7\%$ .  
6  
7

8  
9 The required sample size corresponding to an acceptable margin of error for  
10 proportion (0.1) was calculated. The proportion of HCWs with psychological comorbidity was  
11 estimated at 35%, based on an earlier SARS and COVID-19 outbreak report [9, 19, 20].  
12 To allow for analysis of the relevant subgroups, the investigators of this study increased the  
13 sample size by 50 percent intending to reach at least 1070 participants. The study proforma  
14 was available in both Arabic and English and could be accessed via an online platform (google  
15 document) and any information about this study was in the form itself. All respondents  
16 provided informed consent. At the end of the study survey, 1160 healthcare workers returned  
17 a fully completed study proforma.  
18  
19  
20  
21  
22  
23  
24  
25  
26

### 27 **Outcomes and Covariates**

28  
29 The primary outcomes of this survey are psychological factors and self-reported  
30 sleeping problems. Psychological symptoms were collected by the depression, Anxiety and  
31 Stress Scale (DASS-21): DASS-21 is a self-report screening checklist designed to measure the  
32 negative feelings that are broadly categorized as depressive symptoms, anxiety, and stress  
33 [21]. Both the English and non-English (including Arabic) versions of DASS-21 have been  
34 found to have adequate internal consistency (Cronbach's alpha scores of  $> 0.7$ ) [21, 22]. DASS-  
35 21 has also been used in Oman and reported to have adequate Cronbach's  $\alpha$  for the three  
36 subscales. The present study used the following cut-offs: Depression  $\geq 10$ ; Anxiety  $\geq 8$ ;  
37 Stress  $\geq 16$  [22]. We used the Insomnia Severity Index to solicit the presence of subject's self-  
38 reported sleeping problems. Insomnia Severity Index (ISI) is a 7-item self-report questionnaire  
39 tapping into the severity of insomnia with each item of the scale tap into (1) "perceived severity  
40 of difficulties initiating sleep", (2) "difficulties staying asleep", (3) "early morning awakenings",  
41 (4) "satisfaction with current sleep pattern", (5) "interference with daily functioning", (6)  
42 "noticeability of impairment attributed to the sleep problem", and (7) "degree of distress or  
43 concern caused by the sleep problem" [23]. Both English and non-English including Arabic  
44 versions of the ISI have been found to have adequate internal reliability (Cronbach's alpha  
45 scores of  $> 0.7$ ) [24]. A 5-point Likert scale was used to rate each item (e.g., 0 = no problem; 4  
46 = very severe problem), yielding a total score ranging from 0 to 28. A previous study suggested  
47  
48  
49  
50  
51  
52  
53  
54  
55  
56  
57  
58  
59  
60

1  
2  
3 that a cut-off score of 14 was deemed adequate for detecting clinical insomnia with a  
4 sensitivity of 82.4% and specificity of 82.1% [25].  
5  
6  
7

### 8 9 **Socio-demographic factors**

10 The secondary outcome is the socio-demographic data (nationality, gender, age,  
11 marital status), type of medical setting (primary, secondary, tertiary care, or polyclinic) and  
12 whether they were directly engaged in clinical activities such as diagnosing, treating, or  
13 providing nursing care to patients with elevated temperatures or patients with confirmed  
14 Covid-19 infection. Those who responded as diagnosing, treating, or providing nursing care  
15 were identified as 'frontline HCWs'. Those participants who had no contact with the units  
16 assigned to handle services for COVID-19 patients were defined to constitute second-line  
17 workers or 'non-frontline HCWs'. Participants' job type (physician, nurse, and allied healthcare  
18 professional) was also sought. Allied healthcare professions included pharmacists and other  
19 medical staffing including laboratory technicians. Finally, the participants were also asked  
20 whether they had previously sought consultation for psychiatric disorders ('yes' / 'no').  
21  
22  
23  
24  
25  
26  
27  
28  
29  
30

### 31 32 **Ethical Issues**

33 This study adhered to the American Association for Public Opinion Research reporting  
34 guidelines [26]. Ethical approval was obtained before the commencement of the study from  
35 the local IRB, Directorate General of Planning and Studies, Centre of Studies and Research,  
36 Ministry of Health (MOH/ DGPS/CSR/20/2311). Written consent was sought from participants  
37 and they were told specifically that their involvement could be terminated if they wish so  
38 without undue consequences. The survey was anonymous, and confidentiality of information  
39 was assured.  
40  
41  
42  
43  
44  
45  
46  
47  
48

### 49 50 **Statistical Analysis**

51 Data analysis was performed using SPSS statistical software version 23.0 (IBM Corp).  
52 Descriptive statistics were used to explore the profile of the samples in terms of their  
53 demographic and psychological outcomes. Samples were categorized into the frontline and  
54 non-frontline groups. Chi-square and independent t-tests were used to compare groups by  
55 socio-demographic. Mantel-Haenszel odds ratio was used to compare groups by  
56  
57  
58  
59  
60

1  
2  
3 psychological and vegetable factors adjusted by HCWs' job type, and other socio-  
4 demographic factors. All significant tests were set at 5% alpha level.  
5  
6  
7

### 8 **Patient and Public Involvement**

9  
10 It was not appropriate or possible to involve patients or the public in the design, or conduct,  
11 or reporting, or dissemination plans of our research  
12  
13  
14

### 15 **Results**

16  
17 This cross-sectional study was conducted using an online survey from the 8<sup>th</sup> to the  
18 17<sup>th</sup> of April in 2020 across different health care services in Oman. In total, we received 1167  
19 questionnaires of which 28 were determined to be incomplete on examination. Thus, we only  
20 included 1139 records for further analysis.  
21  
22  
23  
24  
25  
26  
27

### 28 **Demographic and psychological outcomes of the study samples**

29  
30 In Table 1, among the 1139 HCWs, 228 (20.0%) are males, and 911 (80.0%) are females.  
31 Their average age was  $36.3 \pm 6.5$  (Mean  $\pm$  SD) and range from 21 to 65 years. The majority are  
32 Omani (n=981, 86.1%) and are married (n=987, 86.9%). A total of 574 (50.4%) were directly  
33 involved in diagnosing, treating, and taking care of confirmed or suspected cases of COVID19  
34 (frontline group). There were 390 (34.2%), 164 (14.4%), 478 (42.0%), and 106 (9.3%) were  
35 working in primary, secondary health care, tertiary health care as well as polyclinics  
36 respectively. Among those HCWs, 384 (33.7%), 449 (39.5%), and 305 (26.8) were physicians,  
37 nurses, and allied health profession, respectively. Concerning psychological outcomes, 368  
38 (32.3%), 388 (34.1%), 271 (23.8%), and 211 (18.5%) respondents reported symptoms of  
39 depression, anxiety, stress, and insomnia, respectively while working during the pandemic  
40 period.  
41  
42  
43  
44  
45  
46  
47  
48  
49  
50  
51

### 52 **Comparison of frontline and non-frontline staff on demographic and psychological** 53 **factors and self-reported sleeping problems**

54  
55 In Table 1, significant differences were found between the two presently defined  
56 cohorts of HCWs - frontline and non-frontline groups. The frontline group comprised of  
57 members younger in age ( $36.3 \pm 6.5$ ,  $p=0.004$ ) with more of them being non-Omani (n=94,  
58  
59  
60



1  
2  
3 59.5%,  $p=0.014$ ), physicians and nurses ( $n=490$ , 58.8%,  $p<.001$ ), not married ( $n=90$ , 60.4%,  
4  $p=0.008$ ), handled COVID-19 cases ( $n=372$ , 81.2%,  $p<.001$ ), and working in primary health care  
5 setting ( $n=242$ , 62.1%,  $p<.001$ ) as compared to the non-frontline group. With regard to  
6 psychological outcomes, members of the frontline group were 1.5 times more likely to have  
7 anxiety (OR=1.557,  $p=0.004$ ) and stress (OR=1.506,  $p=0.016$ ) as compared to the non-frontline  
8 group. In considering insomnia, the frontline group was 1.5 times more likely to experience  
9 the same (OR=1.586,  $p=0.013$ ) as compared to the non-frontline group. No significant  
10 differences in depression status were found between the two groups ( $p=0.201$ ).  
11  
12  
13  
14  
15  
16  
17  
18

## 19 Discussion

20  
21 Various mechanisms to come to grip with the COVID-19 pandemic, including travel  
22 restrictions, quarantines, and curfews which, in turn, have severely disrupted the social and  
23 economic activities of the society, nation, or for that matter the world [27], have been  
24 proposed. While the impact of socio-economic activities due to COVID-19 has been widely  
25 acknowledged in the countries of the Arabian Gulf [28], what has been overlooked is the fact  
26 that healthcare workers (HCWs) are in the frontline in the COVID-19 pandemic which, in turn,  
27 would suggest the importance of examining their resilience in the light of those challenges.  
28  
29  
30  
31  
32

33 Being a "once-in-a-century pandemic" [29], some of the misgivings affecting HCWs  
34 include the fear of contracting a lethal virus and spreading it to the rest of their social network,  
35 lack of evidence-based prevention and intervention, lack of essential protective gear and the  
36 fact that the pandemic requires protracted shifts with a high volume of patients with different  
37 degrees of pathology and severity [30-43]. This would imply that HCWs are now working in a  
38 uniquely hazardous situation and are thus vulnerable to stress and distress. In addition to  
39 operational stresses, some preliminary studies have suggested that psychosocial dysfunctions  
40 are rife among HCWs [31,35]. A recent systematic literature review and meta-analysis covering  
41 the literature of the pre-pandemic COVID-19 period suggest that 7.0% to 75.2% of HCWs are  
42 burned out [36]. This huge discrepancy in the prevalence of burnout hinges on country-specific  
43 factors, applied instruments and cut-off-criteria for burnout symptomatology [37]. The  
44 prevalence of burnout among HCWs appears to outstrip the general population [38]. Similarly,  
45 in addition to burnout, the prevalence of depressive symptoms, anxiety, and stress among  
46 HCWs are also higher than the general population [14,15, 16]. However, since the higher level  
47 of stress and distress among HCWs as compared to the general population has been a trend  
48  
49  
50  
51  
52  
53  
54  
55  
56  
57  
58  
59  
60

1  
2  
3 existing even before the pandemic, it not clear whether the emerging high level of mental  
4 health outcomes owes its onset to COVID-19. One approach to disentangling this issue is to  
5 compare mental health outcomes between frontline HCWs vs non-frontline HCWs. This study  
6 had therefore embarked on the assessment and comparison of demographic and  
7 psychological factors and sleep status of frontline versus non-frontline HCWs.  
8  
9  
10  
11

12 The present study accrued 1139 HCWs from different parts of the country. As the HCWs  
13 in Oman are predominantly female [39], this study is in line with the observed 'effeminization'  
14 of healthcare as 80.0% of the present participants were female. Approximately 50% fulfil the  
15 present definition of 'frontline HCWs' who, in their clinical practices, diagnose, treat, and take  
16 care of confirmed or suspected cases of COVID-19 in their respective clinics across the country.  
17 The cohort consisted of physicians, nurses, and allied health professionals.  
18  
19  
20  
21  
22

23 To tap into the levels of depression, anxiety, and stress, the *Depression, Anxiety, and*  
24 *Stress Scale* (DASS-21) was used. Of the present cohort, comprised of both frontline and non-  
25 frontline HCWs, 32.3% endorsed case-ness for depressive symptoms, 34.1% for anxiety, and  
26 23.8% for stress. In Singapore among HCWs using DASS-21, Tan et al. [40] have reported 8.9%  
27 case-ness for depression, 14.5% for anxiety, and 6.6% for stress. Using different screening  
28 tools, Lai et al. [9] have reported 50.4%, 44.6%, and 71.5% symptoms of depression, anxiety,  
29 and distress respectively  
30 while Wang et al. [20] reported 61.6% of their sample of HCWs indorsed self-reported sleep  
31 problems, 22.6% anxiety symptom and 35% depressive symptoms among HCWs in Hubei  
32 province in China Lai's study indicated that 34.0% of their sample had an elevated score of  
33 insomnia which appears to be lower compared to the prevalence of 38.9% among HCWs  
34 investigated as part of the studies included in their systematic review and meta-analysis [35].  
35 Putting these studies together and within the background of the general population, other  
36 than the lower rate of depression in Singapore, the magnitude of mental health outcomes  
37 appears to be higher among HCWs when compared to the general population. In the general  
38 population, the prevalence of depression, anxiety, and insomnia have been estimated to be  
39 11.1% [14], 5.3%, 7.3% [15], and 10% - 30% [16] respectively. Low mental health outcomes  
40 among HCWs in Oman and Singapore could be attributed to the preparedness phase the  
41 country underwent as the first cases were registered much later than when the World Health  
42 organization declared COVID-19 a global pandemic [1]. While studies on the status of mental  
43 health outcomes and sleep status have been forthcoming from different parts of the world,  
44  
45  
46  
47  
48  
49  
50  
51  
52  
53  
54  
55  
56  
57  
58  
59  
60

1  
2  
3 many of them are single-center [10] and regional studies [9] with some of the catchment areas  
4 not being defined [40]. A study with a nationally representative sample of HCWs taking into  
5 account both the frontline and non-frontline are therefore warranted.  
6  
7

8  
9 The second aim of the present study was to compare demographic and psychological  
10 outcomes among frontline and non-frontline HCWs. The present data suggest that frontline  
11 HCWs are likely to be younger, single, physicians or nurses working in primary healthcare and  
12 are required to handle COVID-19 cases. The majority of frontline HCWs were non-Omani, a  
13 trend that is worth contemplating. Despite the effort to 'Omanize' the healthcare  
14 infrastructure, foreign nationals still form the bulk of HCWs in Oman [41]. The COVID-19  
15 pandemic has resulted in travel restrictions and an expected economic recession, resultant job  
16 security, and being cut off from their country of origin for the migrant population [42]. It  
17 remains to be seen whether these factors have rendered non-Omani HCWS to be more  
18 vulnerable to the presently observed mental health outcomes.  
19  
20  
21  
22  
23  
24  
25  
26

27 In psychological outcomes, compared to non-frontline HCWs, frontline HCWs were  
28 more likely to endorse anxiety symptoms and stress. A similar trend was observed with  
29 insomnia. Interestingly, the depressive symptoms did not emerge as being significant in the  
30 equation employed to differentiate between frontline vs non-frontline HCWs. Oman is  
31 characterized by a collectivistic society that is in direct contrast to western individualistic  
32 societies [43]. In such a society, anxiety symptoms ('I experienced trembling in the hands') and  
33 stress ('I felt that I was using a lot of nervous energy') tend to be perceived to be a veneer of  
34 physical symptoms and are therefore likely to be endorsed. In contrast, depressive symptoms  
35 ('I felt down-hearted and blue') are thought to be more of a weakness of character than a  
36 manifestation of 'disease'. As psychological outcomes are increasingly recognized to emerge  
37 as a consequence of COVID-19 [13], more studies are needed to decipher the culturally-  
38 specific idioms of distress intimately tied to mental health outcomes during the pandemic.  
39  
40  
41  
42  
43  
44  
45  
46  
47  
48  
49  
50  
51

## 52 **Limitations**

53 Most psychosocial studies of this nature tend to have many limitations owing to the  
54 amorphous variables under scrutiny. Firstly, conducting a national wide survey requires proper  
55 logistics which was not feasible during the lockdown. An online survey is known to marred by  
56 the fact that it tends to accrue a selective population who are technologically savvy and more  
57  
58  
59  
60

1  
2  
3 familiar with the evolving 'internet culture' [44]. Notwithstanding such a view, this study  
4 appears to have reached its targeted population based on the estimated sample size. Oman  
5 has established that > 71% of the total population (4.6 million) has access to internet services  
6 [44]. Secondly, DASS-21 and ISI are no match for the 'gold-standard' interviews such as those  
7 that follow the *Diagnostic and Statistical Manual of Mental Disorders* and World Health  
8 Organization *Composite International Diagnostic Interview (CIDI)*. However, quick symptom  
9 checklists such as DAS-21 and ISI are the only viable tools to conduct such a study given the  
10 current circumstances [9]. Related to this, future studies could employ objective measures  
11 solicit the presence of sleep architecture. Lastly, time factors are also considered important  
12 for quantifying the presence of psychological disorders. Within this view, it not clear whether  
13 the observed mental health outcomes constitute adjustment disorders/ acute stress reaction  
14 or present a chronic-type and thus irreversible psychological distress. Follow-up studies in this  
15 regard are therefore warranted.

### 28 **Conclusion:**

30 COVID-19, a new strain among the class of Coronavirus, has recently gripped all  
31 corners of the world triggering a global public health emergency. Within the background of  
32 high rates of poor coping among HCWs even before the pandemic, studies are needed to  
33 explore how frontline HCWs fare compared to non-frontline HCWs in this regard. This study  
34 highlighted and appeared to be congruent with other studies in suggesting that the COVID-  
35 19 outbreak has triggered a higher rate of depressive symptoms, anxiety, and insomnia among  
36 HCWs. In comparing frontline and non-frontline HCWs, the present data suggested that  
37 frontline HCWs were likely to be younger non-Omani physicians or nurses who were single,  
38 and working in primary healthcare. It is therefore paramount to offer timely psychological  
39 intervention for the HCWs to promote coping and resilience among these vulnerable HCWs.

### 52 **ARTICLE INFORMATION**

54 **Corresponding Authors:** Dr. Samir Al-Adawi, Department of Behavioral Medicine,  
55 College of Medicine & Health Sciences, Sultan Qaboos University, P.O. Box 35, Al  
56 Khoudh 123, Muscat, Oman (samir.al-adawi@fulbrightmail.org)

1  
2  
3 Al Masarra Hospital, Ministry of Health, Wilayat Al Amerat, Muscat (**Alshekaili M.,**  
4 **Hassan W., Al-Said N., alsulimani F.**); Centre of Studies & Research, Directorate  
5 General Planning and studies, Ministry of Health, Oman (**Kumar S., Al-Mawali A.**);  
6 Department of Family Medicine & Public Health, Sultan Qaboos University, Muscat,  
7 Oman(**Chan, Moon Fai**); Department of Behavioral Medicine, Sultan Qaboos  
8 University Hospital, Muscat, Oman (Mahadevan **S., Al-Adawi S.**)  
9  
10  
11

12 **Author Contributions:** Drs Muna Alshekaili, Walid Hassan, Nazik Al-Said, Fatima  
13 Alsulimani and Satish Kumar had full access to all of the data in the study and take  
14 responsibility for the integrity of the data and the accuracy of the data analysis.  
15  
16

17 **Concept and design:** Muna Alshekaili, Samir Al-Adawi.  
18  
19

20 **Acquisition, analysis, or interpretation of data:** Muna Alshekaili, Walid Hassan,  
21 Satish Kumar, Adhra Al-Mawali, Moon Fai Chan  
22  
23

24 **Drafting of the manuscript:** Muna Alshekaili, Walid Hassan, Samir Al-Adawi.  
25  
26

27 **Critical revision of the manuscript for important intellectual content:** Samir Al-  
28 Adawi, Sangeetha Mahadevan, Moon Fai Chan  
29  
30

31 **Statistical analysis:** Walid Hassan, Moon Fai Chan  
32  
33

34 **Administrative, technical, or material support:** Satish Kumar, Adhra Al-Mawali,  
35  
36

37 **Supervision:** Muna Alshekaili, Walid Hassan.  
38  
39

40 **Conflict of Interest Disclosures:** None reported.  
41  
42

43 **Funding/Support:** This research received no specific grant from any funding agency  
44 in the public, commercial or not-for-profit sectors.  
45  
46

47 **Additional Contributions:** We thank all the participants who contributed to our  
48 work.  
49  
50

51 **Data Statement:** All data generated and analysed during this study are included as  
52 part of this article.  
53  
54  
55  
56  
57  
58  
59  
60

## References

1. Balkhair AA. COVID-19 Pandemic: A New Chapter in the History of Infectious Diseases. *Oman Medical Journal*. 2020 Mar;35(2):e123
2. The Arabian Stories. Coronavirus: Omanis banned from leaving the country. March 18, 2020. <https://www.thearabianstories.com/2020/03/18/coronavirus-omanis-banned-from-leaving-the-country/>
3. Oman Observer. Oman reports 463 new cases, total 7,257. 23/05/2020. <https://www.omanoobserver.com/oman-reports-463-new-cases-total-7257/>.
4. Ministry of Health (2020). Directorate general of information technology. Sultanate of Oman. <https://covid19.moh.gov.om/#/home>.
5. Khamis, F., Al Rashidi, B., Al-Zakwani, I., Al Wahaibi, A. H., & Al Awaidy, S. T. (2020). Epidemiology of COVID-19 Infection in Oman: Analysis of the First 1304 Cases. *Oman medical journal*, 35(3), e141. <https://doi.org/10.5001/omj.2020.60>.
6. de Kloet E, Joëls M. Mineralocorticoid Receptors and Glucocorticoid Receptors in HPA Stress Responses During Coping and Adaptation. *Oxford Research Encyclopedia of Neuroscience*, 2020. Retrieved 23 May. 2020, from <https://oxfordre.com/neuroscience/view/10.1093/acrefore/9780190264086.001.0001/acrefore-9780190264086-e-266>.
7. Barranco R, Ventura F. Covid-19 and infection in health-care workers: An emerging problem [published online ahead of print, 2020 May 22]. *Med Leg J*. 2020;25817220923694. doi:10.1177/0025817220923694.
8. Jin YH, Huang Q, Wang YY, et al. Perceived infection transmission routes, infection control practices, psychosocial changes, and management of COVID-19 infected healthcare workers in a tertiary acute care hospital in Wuhan: a cross-sectional survey. *Mil Med Res*. 2020;7(1):24. Published 2020 May 11. doi:10.1186/s40779-020-00254-8.
9. Lai J, Ma S, Wang Y, et al. Factors Associated With Mental Health Outcomes Among Health Care Workers Exposed to Coronavirus Disease 2019. *JAMA Netw Open*. 2020;3(3):e203976. Published 2020 Mar 2. doi:10.1001/jamanetworkopen.2020.3976
10. Badahdah AM, Khamis F, Mahyijari NA. The psychological well-being of physicians during COVID-19 outbreak in Oman [published online ahead of print, 2020 May 6]. *Psychiatry Res*. 2020;289:113053. doi:10.1016/j.psychres.2020.113053.

11. Shah K, Kamrai D, Mekala H, Mann B, Desai K, Patel RS. Focus on mental health during the coronavirus (COVID-19) pandemic: applying learnings from the past outbreaks. *Cureus*. 2020 Mar;12(3).
12. Wang C, Pan R, Wan X, Tan Y, Xu L, Ho CS, Ho RC. Immediate psychological responses and associated factors during the initial stage of the 2019 coronavirus disease (COVID-19) epidemic among the general population in china. *International Journal of Environmental Research and Public Health*. 2020 Jan;17(5):1729.
13. Holmes EA, O'Connor RC, Perry VH, et al. Multidisciplinary research priorities for the COVID-19 pandemic: a call for action for mental health science. *Lancet Psychiatry*. 2020;7(6):547-560. doi:10.1016/S2215-0366(20)30168-1.
14. Bromet E, Andrade LH, Hwang I, et al. Cross-national epidemiology of DSM-IV major depressive episode. *BMC Med*. 2011;9:90. doi:10.1186/1741-7015-9-90.
15. Baxter AJ, Scott KM, Vos T, Whiteford HA. Global prevalence of anxiety disorders: a systematic review and meta-regression. *Psychol Med*. 2013;43(5):897-910. doi:10.1017/S003329171200147X.
16. Roth T. Insomnia: definition, prevalence, etiology, and consequences. *J Clin Sleep Med*. 2007;3(5 Suppl): S7-S10.
17. Mataria A, Hajjeh R, Al-Mandhari A. Surviving or thriving in the Eastern Mediterranean region: the quest for universal health coverage during conflict. *Lancet*. 2020;395(10217):13-15. doi:10.1016/S0140-6736(19)33061-2.
18. Al Riyami A, Elaty MA, Morsi M, Al Kharusi H, Al Shukaily W, Jaju S. Oman world health survey: part 1 - methodology, sociodemographic profile and epidemiology of non-communicable diseases in oman. *Oman Med J*. 2012;27(5):425-443.
19. Lee AM, Wong JG, McAlonan GM, et al. Stress and psychological distress among SARS survivors 1 year after the outbreak. *Can J Psychiatry*. 2007;52(4):233-240. doi:10.1177/070674370705200405.
20. Wang W, Song W, Xia Z, He Y, Tang L, Hou J, Lei S. Sleep Disturbance and Psychological Profiles of Medical Staff and Non-Medical Staff During the Early Outbreak of COVID-19 in Hubei Province, China. *Front Psychiatry*. 2020 Jul 22;11:733. doi: 10.3389/fpsy.2020.00733. PMID: 32793014; PMCID: PMC7387679
21. Moussa MT, Lovibond P, Laube R, Megahead HA. Psychometric properties of an arabic version of the depression anxiety stress scales (DASS). *Research on Social Work Practice*. 2017 May;27(3):375-86.

- 1  
2  
3  
4  
5  
6  
7  
8  
9  
10  
11  
12  
13  
14  
15  
16  
17  
18  
19  
20  
21  
22  
23  
24  
25  
26  
27  
28  
29  
30  
31  
32  
33  
34  
35  
36  
37  
38  
39  
40  
41  
42  
43  
44  
45  
46  
47  
48  
49  
50  
51  
52  
53  
54  
55  
56  
57  
58  
59  
60
22. Lee J, Lee EH, Moon SH. Systematic review of the measurement properties of the Depression Anxiety Stress Scales-21 by applying updated COSMIN methodology. *Qual Life Res.* 2019;28(9):2325-2339. doi:10.1007/s11136-019-02177-x.
  23. Morin CM. *Insomnia: Psychological assessment and management.* New York: Guilford Press; 1993.
  24. Suleiman KH, Yates BC. Translating the insomnia severity index into Arabic. *Journal of Nursing Scholarship.* 2011 Mar;43(1):49-53.
  25. Gagnon C, Bélanger L, Ivers H, Morin CM. Validation of the Insomnia Severity Index in primary care. *J Am Board Fam Med.* 2013 Nov-Dec;26(6):701-10. doi: 10.3122/jabfm.2013.06.130064.
  26. American Association for Public Opinion Research (AAPOR) reporting guideline. <https://www.aapor.org/Publications-Media/AAPOR-Journals/Standard-Definitions.aspx>.
  27. Bedford J, Enria D, Giesecke J, et al. COVID-19: towards controlling of a pandemic. *Lancet.* 2020;395(10229):1015-1018. doi:10.1016/S0140-6736(20)30673-5.
  28. Country/Territory Report - Oman.; 2020:1-49. <http://ezproxysrv.squ.edu.om:2127/login.aspx?direct=true&db=awr&AN=143036153&site=ehost-live&scope=site>. Accessed May 29, 2020.
  29. Gates B. Responding to Covid-19 - A Once-in-a-Century Pandemic?. *N Engl J Med.* 2020;382(18):1677-1679. doi:10.1056/NEJMp2003762
  30. Senni M. COVID-19 experience in Bergamo, Italy. *Eur Heart J.* 2020;0:1–2. doi: 10.1093/eurheartj/ehaa279
  31. Huang J, Liu F, Teng Z, et al. Care for the psychological status of frontline medical staff fighting against COVID-19 [published online ahead of print, 2020 Apr 3]. *Clin Infect Dis.* 2020;ciaa385. doi:10.1093/cid/ciaa385.
  32. Jalili, M., Niroomand, M., Hadavand, F., Zeinali, K. & Fotouhi, A. (2020). Burnout among healthcare professionals during COVID-19 pandemic: a cross-sectional study. *medRxiv*, 2020.06.12.20129650.
  33. Kisely, S., Warren, N., McMahon, L., Dalais, C., Henry, I., & Siskind, D. (2020). Occurrence, prevention, and management of the psychological effects of emerging virus outbreaks on healthcare workers: rapid review and meta-analysis. *BMJ (Clinical research ed.)*, 369, m1642. <https://doi.org/10.1136/bmj.m1642>.



- 1  
2  
3  
4  
5  
6  
7  
8  
9  
10  
11  
12  
13  
14  
15  
16  
17  
18  
19  
20  
21  
22  
23  
24  
25  
26  
27  
28  
29  
30  
31  
32  
33  
34  
35  
36  
37  
38  
39  
40  
41  
42  
43  
44  
45  
46  
47  
48  
49  
50  
51  
52  
53  
54  
55  
56  
57  
58  
59  
60
34. Chen, Q., Liang, M., Li, Y., Guo, J., Fei, D., Wang, L., He, L., Sheng, C., Cai, Y., Li, X., Wang, J., & Zhang, Z. (2020). Mental health care for medical staff in China during the COVID-19 outbreak. *The lancet. Psychiatry*, 7(4), e15–e16. [https://doi.org/10.1016/S2215-0366\(20\)30078-X](https://doi.org/10.1016/S2215-0366(20)30078-X)
  35. Pappa S, Ntella V, Giannakas T, Giannakoulis VG, Papoutsis E, Katsaounou P. Prevalence of depression, anxiety, and insomnia among healthcare workers during the COVID-19 pandemic: A systematic review and meta-analysis [published online ahead of print, 2020 May 8]. *Brain Behav Immun*. 2020; S0889-1591(20)30845-X. doi:10.1016/j.bbi.2020.05.026.
  36. Erschens R, Keifenheim KE, Herrmann-Werner A, et al. Professional burnout among medical students: Systematic literature review and meta-analysis. *Med Teach*. 2019;41(2):172-183. doi:10.1080/0142159X.2018.1457213.
  37. Rotenstein LS, Torre M, Ramos MA, et al. Prevalence of Burnout among Physicians: A Systematic Review. *JAMA*. 2018;320(11):1131-1150. doi:10.1001/jama.2018.12777
  38. Dyrbye LN, West CP, Satele D, et al. Burnout among U.S. medical students, residents, and early career physicians relative to the general U.S. population. *Acad Med*. 2014;89(3):443-451. doi:10.1097/ACM.000000000000134.
  39. Mohamed NA, Abdulhadi NN, Al-Maniri AA, Al-Lawati NR, Al-Qasmi AM. The trend of feminization of doctors' workforce in Oman: is it a phenomenon that could rouse the health system?. *Hum Resour Health*. 2018;16(1):19. doi:10.1186/s12960-018-0283-y.
  40. Tan BYQ, Chew NWS, Lee GKH, et al. Psychological Impact of the COVID-19 Pandemic on Health Care Workers in Singapore [published online ahead of print, 2020 Apr 6]. *Ann Intern Med*. 2020; M20-1083. doi:10.7326/M20-1083.
  41. Emerson C. Localization of the Nursing Workforce in the Sultanate of Oman. *Case Studies in Global Health Policy Nursing*. 2018 Jun 28:85.
  42. Liem A, Wang C, Wariyanti Y, Latkin CA, Hall BJ. The neglected health of international migrant workers in the COVID-19 epidemic. *The Lancet Psychiatry*. 2020 Apr 1;7(4): e20.
  43. Al-Adawi S. Adolescence in Oman. In Jeffrey Jensen Arnett, Editor. *International Encyclopedia of Adolescence: A Historical and Cultural Survey of Young People around the World (2 Volume Set)*. New York: Routledge, 2006, pp.713-828.
  44. Belwal R, Al Shibli R, Belwal S. Consumer protection and electronic commerce in the Sultanate of Oman. *Journal of Information, Communication and Ethics in Society*. 2020 <https://doi.org/10.1108/JICES-09-2019-0110.38>.

**Table 1. Comparison of the frontline with non-frontline staff in association of demographic and psychological factors, and self-reported sleeping problems during the impacts of COVID-19 in Oman**

| Variables                                          |               | Total<br>(n=1139) | Frontline HCWs | Non-frontline<br>HCWs | Statistics <sup>a</sup> | p-value |
|----------------------------------------------------|---------------|-------------------|----------------|-----------------------|-------------------------|---------|
|                                                    |               |                   | Yes (n=574)    | No (n=565)            |                         |         |
|                                                    |               | n (%)             | n (%)          | n (%)                 |                         |         |
| <b><i>Socio-demographics factors</i></b>           |               |                   |                |                       |                         |         |
| Age (Years)                                        | Mean ± SD     | 36.3 ± 6.5        | 35.8 ± 6.1     | 36.9 ± 6.8            | 2.884 <sup>b</sup>      | 0.004   |
| Gender                                             | Male          | 228 (20.0)        | 102 (44.7)     | 126 (55.3)            | 3.651                   | 0.056   |
|                                                    | Female        | 911 (80.0)        | 472 (51.8)     | 439 (48.2)            |                         |         |
| Nationality                                        | Omani         | 981 (86.1)        | 480 (48.9)     | 501 (51.1)            | 6.075                   | 0.014   |
|                                                    | Non-Omani     | 158 (13.9)        | 94 (59.5)      | 64 (40.5)             |                         |         |
| Healthcare type                                    | Physician     | 384 (33.7)        | 229 (59.6)     | 155 (40.4)            | 87.586                  | <0.001  |
|                                                    | Nurse         | 449 (39.5)        | 261 (58.1)     | 188 (41.9)            |                         |         |
|                                                    | Allied health | 305 (26.8)        | 84 (27.5)      | 221 (72.5)            |                         |         |
| Previous sought mental health consultation         | No            | 1013 (89.3)       | 512 (50.5)     | 501 (49.5)            | 0.013                   | 0.910   |
|                                                    | Yes           | 122 (10.7)        | 61 (50.0)      | 61 (50.0)             |                         |         |
| Marital status                                     | Not married   | 149 (13.1)        | 90 (60.4)      | 59 (39.6)             | 6.930                   | 0.008   |
|                                                    | Married       | 987 (86.9)        | 482 (48.8)     | 505 (51.2)            |                         |         |
| Number of COVID-19 cases were handled <sup>+</sup> | No            | 679 (59.7)        | 200 (29.5)     | 479 (70.5)            | 293.203                 | <0.001  |
|                                                    | Yes           | 458 (40.3)        | 372 (81.2)     | 86 (18.8)             |                         |         |
|                                                    | 1-5 cases     | 312 (68.1)        | 254 (81.4)     | 58 (18.6)             | 0.023                   | 0.881   |
|                                                    | 6+ cases      | 146 (31.9)        | 118 (80.8)     | 28 (19.2)             |                         |         |
| Type of healthcare                                 | Primary       | 390 (34.3)        | 242 (62.1)     | 148 (37.9)            | 44.884                  | <0.001  |
|                                                    | Secondary     | 164 (14.4)        | 70 (42.7)      | 94 (57.3)             |                         |         |

|                                                                                                                              |            |            |             |            |                    |       |
|------------------------------------------------------------------------------------------------------------------------------|------------|------------|-------------|------------|--------------------|-------|
|                                                                                                                              | Tertiary   | 478 (42.0) | 231 (48.3)  | 247 (51.7) |                    |       |
|                                                                                                                              | Polyclinic | 106 (9.3)  | 31 (29.2)   | 75 (70.8)  |                    |       |
| <b>Psychological symptoms</b>                                                                                                |            |            |             |            |                    |       |
| DASS - Depression                                                                                                            | Yes        | 368 (32.3) | 196 (53.3)  | 172 (46.7) | 1.219 <sup>c</sup> | 0.201 |
|                                                                                                                              | No         | 771 (67.7) | 378 (49.0)  | 393 (51.0) |                    |       |
| DASS - Anxiety                                                                                                               | Yes        | 388 (34.1) | 217 (55.9)  | 171 (44.1) | 1.557 <sup>c</sup> | 0.004 |
|                                                                                                                              | No         | 751 (65.9) | 357 (47.5)  | 394 (52.5) |                    |       |
| DASS - Stress                                                                                                                | Yes        | 271 (23.8) | 154 (56.98) | 117 (43.2) | 1.506 <sup>c</sup> | 0.016 |
|                                                                                                                              | No         | 868 (76.2) | 420 (48.4)  | 448 (51.6) |                    |       |
| <b>Self-reported sleeping problems</b>                                                                                       |            |            |             |            |                    |       |
| Insomnia Severity Index                                                                                                      | Yes        | 211 (18.5) | 120 (56.9)  | 91 (43.1)  | 1.586 <sup>c</sup> | 0.013 |
|                                                                                                                              | No         | 928 (81.5) | 454 (48.9)  | 474 (51.1) |                    |       |
| a, Chi-square; b, t statistic; c, Mantel-Haenszel odds ratio adjusted by all socio-demographic factors; +, 2 missing records |            |            |             |            |                    |       |
| DASS, The Depression, Anxiety, and Stress Scale (DASS-21)                                                                    |            |            |             |            |                    |       |

STROBE Statement—Checklist of items that should be included in reports of *cross-sectional studies*

|                              | Item No | Recommendation                                                                                                                                                                                    | Page No |
|------------------------------|---------|---------------------------------------------------------------------------------------------------------------------------------------------------------------------------------------------------|---------|
| Title and abstract           | 1       | (a) Indicate the study's design with a commonly used term in the title or the abstract                                                                                                            | 2       |
|                              |         | (b) Provide in the abstract an informative and balanced summary of what was done and what was found                                                                                               | 3       |
| <b>Introduction</b>          |         |                                                                                                                                                                                                   |         |
| Background/rationale         | 2       | Explain the scientific background and rationale for the investigation being reported                                                                                                              | 4-5     |
| Objectives                   | 3       | State specific objectives, including any prespecified hypotheses                                                                                                                                  | 5       |
| <b>Methods</b>               |         |                                                                                                                                                                                                   |         |
| Study design                 | 4       | Present key elements of study design early in the paper                                                                                                                                           | 5       |
| Setting                      | 5       | Describe the setting, locations, and relevant dates, including periods of recruitment, exposure, follow-up, and data collection                                                                   | 5       |
| Participants                 | 6       | (a) Give the eligibility criteria, and the sources and methods of selection of participants                                                                                                       | 6       |
| Variables                    | 7       | Clearly define all outcomes, exposures, predictors, potential confounders, and effect modifiers. Give diagnostic criteria, if applicable                                                          | 6       |
| Data sources/<br>measurement | 8*      | For each variable of interest, give sources of data and details of methods of assessment (measurement). Describe comparability of assessment methods if there is more than one group              | 6       |
| Bias                         | 9       | Describe any efforts to address potential sources of bias                                                                                                                                         | 6       |
| Study size                   | 10      | Explain how the study size was arrived at                                                                                                                                                         | 6       |
| Quantitative variables       | 11      | Explain how quantitative variables were handled in the analyses. If applicable, describe which groupings were chosen and why                                                                      | NA      |
| Statistical methods          | 12      | (a) Describe all statistical methods, including those used to control for confounding                                                                                                             | 7-8     |
|                              |         | (b) Describe any methods used to examine subgroups and interactions                                                                                                                               | 7-8     |
|                              |         | (c) Explain how missing data were addressed                                                                                                                                                       | 7-8     |
|                              |         | (d) If applicable, describe analytical methods taking account of sampling strategy                                                                                                                | 8       |
|                              |         | (e) Describe any sensitivity analyses                                                                                                                                                             | NA      |
| <b>Results</b>               |         |                                                                                                                                                                                                   |         |
| Participants                 | 13*     | (a) Report numbers of individuals at each stage of study—eg numbers potentially eligible, examined for eligibility, confirmed eligible, included in the study, completing follow-up, and analysed | 8       |
|                              |         | (b) Give reasons for non-participation at each stage                                                                                                                                              | 8       |
|                              |         | (c) Consider use of a flow diagram                                                                                                                                                                | NA      |

|                          |     |                                                                                                                                                                                                              |       |
|--------------------------|-----|--------------------------------------------------------------------------------------------------------------------------------------------------------------------------------------------------------------|-------|
| Descriptive data         | 14* | (a) Give characteristics of study participants (eg demographic, clinical, social) and information on exposures and potential confounders                                                                     | 8     |
|                          |     | (b) Indicate number of participants with missing data for each variable of interest                                                                                                                          | 8     |
| Outcome data             | 15* | Report numbers of outcome events or summary measures                                                                                                                                                         | 8     |
| Main results             | 16  | (a) Give unadjusted estimates and, if applicable, confounder-adjusted estimates and their precision (eg, 95% confidence interval). Make clear which confounders were adjusted for and why they were included | 8-9   |
|                          |     | (b) Report category boundaries when continuous variables were categorized                                                                                                                                    | NA    |
|                          |     | (c) If relevant, consider translating estimates of relative risk into absolute risk for a meaningful time period                                                                                             | NA    |
| Other analyses           | 17  | Report other analyses done—eg analyses of subgroups and interactions, and sensitivity analyses                                                                                                               | NA    |
| <b>Discussion</b>        |     |                                                                                                                                                                                                              |       |
| Key results              | 18  | Summarise key results with reference to study objectives                                                                                                                                                     | 9     |
| Limitations              | 19  | Discuss limitations of the study, taking into account sources of potential bias or imprecision. Discuss both direction and magnitude of any potential bias                                                   | 11-12 |
| Interpretation           | 20  | Give a cautious overall interpretation of results considering objectives, limitations, multiplicity of analyses, results from similar studies, and other relevant evidence                                   | 12    |
| Generalisability         | 21  | Discuss the generalisability (external validity) of the study results                                                                                                                                        | 12    |
| <b>Other information</b> |     |                                                                                                                                                                                                              |       |
| Funding                  | 22  | Give the source of funding and the role of the funders for the present study and, if applicable, for the original study on which the present article is based                                                | NA    |

\*Give information separately for exposed and unexposed groups.

**Note:** An Explanation and Elaboration article discusses each checklist item and gives methodological background and published examples of transparent reporting. The STROBE checklist is best used in conjunction with this article (freely available on the Web sites of PLoS Medicine at <http://www.plosmedicine.org/>, Annals of Internal Medicine at <http://www.annals.org/>, and Epidemiology at <http://www.epidem.com/>). Information on the STROBE Initiative is available at [www.strobe-statement.org](http://www.strobe-statement.org).
